# Supplementary material for: Uncovering signal transduction networks from high-throughput data by integer linear programming
Source: PubMed Central journal article supplement — Nucleic Acids Res. 2008 Apr 13;36(9):e48. doi: 10.1093/nar/gkn145 (PMC2396433; doi:10.1093/nar/gkn145), 2008-04-13
Supplement: gkn145_1.pdf [file gkn145_1.pdf]

# Uncovering signal transduction networks from high-throughput data by linear programming

[**Subject Categories**] Computational methods/Signal Transduction

Xing-Ming Zhao<sup>1,2</sup>      Rui-Sheng Wang<sup>3</sup>

Luonan Chen,<sup>1,2,3</sup>

Kazuyuki Aihara<sup>1,2</sup>

1. ERATO Aihara Complexity Modelling Project, JST,

Tokyo 151-0064, Japan

2. Institute of Industrial Science,

The University of Tokyo, Tokyo 153-8505, Japan

3. Department of Electrical Engineering and Electronics,

Osaka Sangyo University, Osaka 574-8530, Japan

February 19, 2008

## **Supplementary materials**

### **Supplementary figure 1**

The figure shows the curve for density versus  $\lambda$  for ILP in detecting pheromone STN based on PPI data, where  $\lambda$  corresponding to the largest density is chosen.

### **Supplementary figure 2**

The figure shows the curve for density versus  $\lambda$  for ILP in detecting filamentation STN based on PPI data, where  $\lambda$  corresponding to the largest density is chosen.

### **Supplementary figure 3**

The figure shows the curve for density versus  $\lambda$  for ILP in detecting pheromone STN based on PPI and gene expression data, where  $\lambda$  corresponding to the largest density is chosen.

### **Supplementary figure 4**

The figure shows the curve for density versus  $\lambda$  for ILP in detecting filamentation STN based on PPI and gene expression data, where  $\lambda$  corresponding to the largest density is chosen.

### **Supplementary figure 5**

The figure shows the curve for density versus  $\lambda$  for ILP in detecting cell wall STN based on PPI and gene expression data, where  $\lambda$  corresponding to the largest density is chosen.

### **Supplementary figure 6**

Pheromone signaling networks generated with integrated data. (a)  $\lambda=0$ , (b)  $\lambda=0.60$ .

### **Supplementary figure 7**

Filamentation signaling networks generated with integrated data. (a)  $\lambda=0$ , (b)  $\lambda=0.58$ .

### **Supplementary figure 8**

Cell wall signaling networks generated with integrated data. (a)  $\lambda=0$ , (b)  $\lambda=0.30$ .

### **Supplementary text1**

The ranking list found by the pairwise correlation for HOG signaling pathway based on PPI and gene expression data.

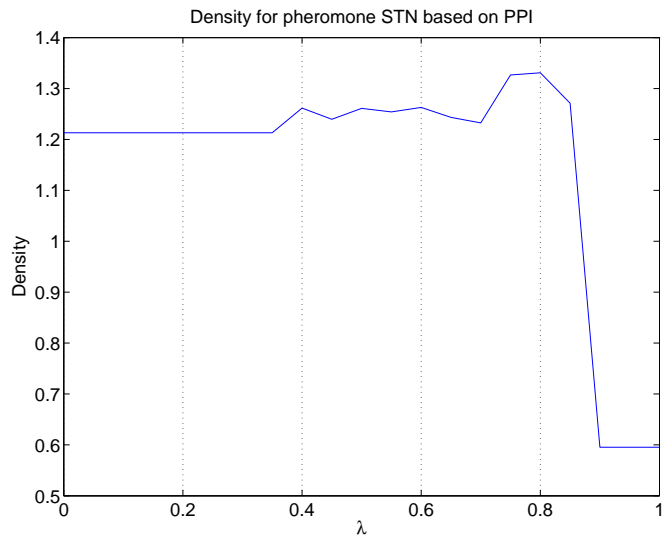

Figure 1: The curve for density versus  $\lambda$  for ILP in detecting pheromone STN based on PPI data, where  $\lambda$  corresponding to the largest density is chosen.

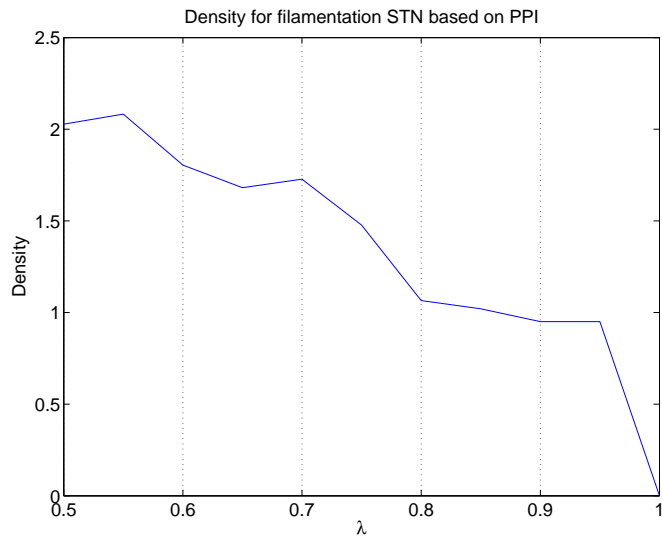

Figure 2: The curve for density versus  $\lambda$  for ILP in detecting filamentation STN based on PPI data, where  $\lambda$  corresponding to the largest density is chosen.

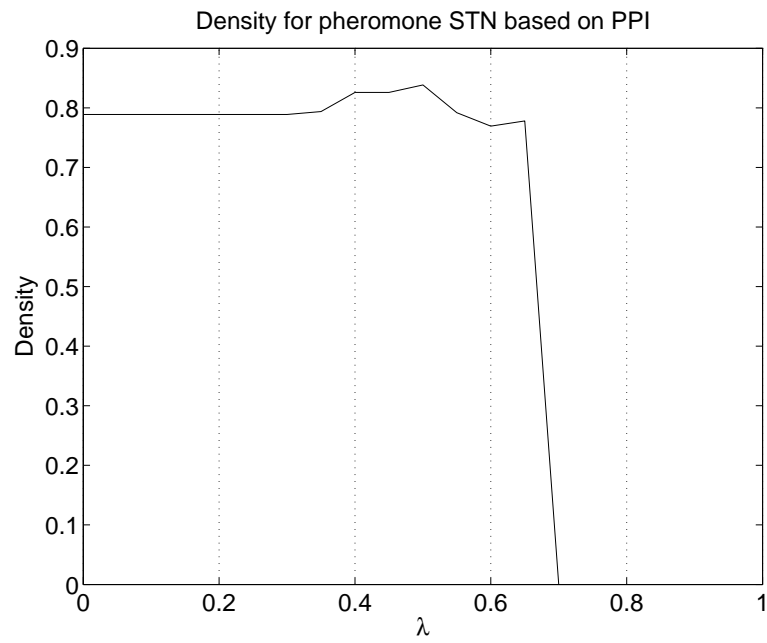

Figure 3: The curve for density versus  $\lambda$  for ILP in detecting pheromone STN based on PPI and gene expression data, where  $\lambda$  corresponding to the largest density is chosen.

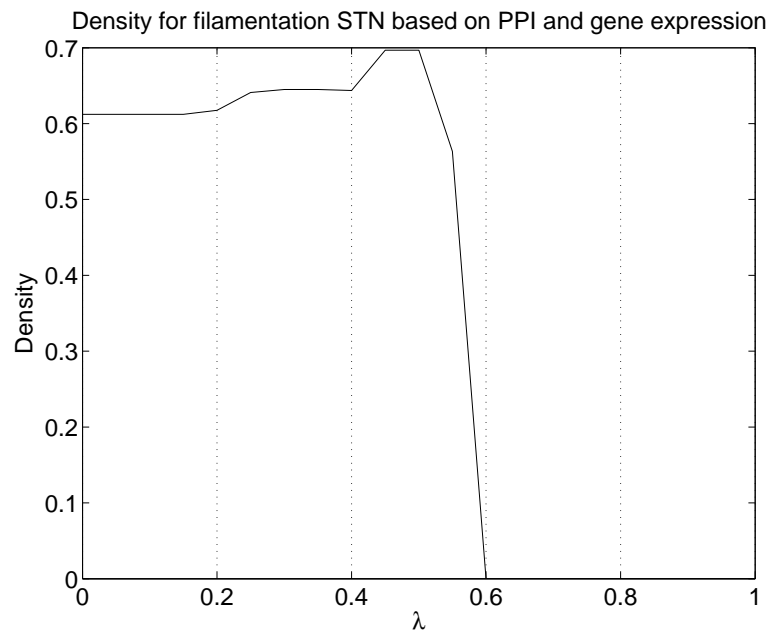

Figure 4: The curve for density versus  $\lambda$  for ILP in detecting filamentation STN based on PPI and gene expression data, where  $\lambda$  corresponding to the largest density is chosen.

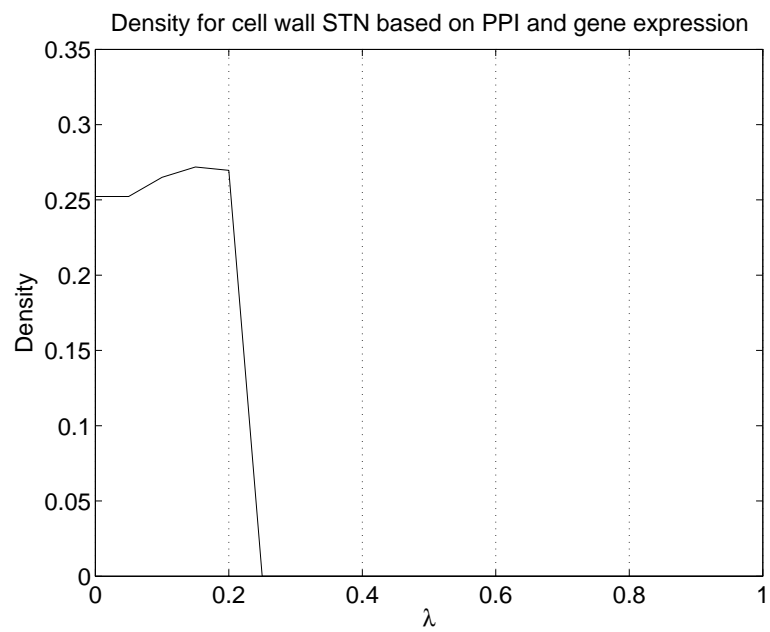

Figure 5: The curve for density versus  $\lambda$  for ILP in detecting cell wall STN based on PPI and gene expression data, where  $\lambda$  corresponding to the largest density is chosen.





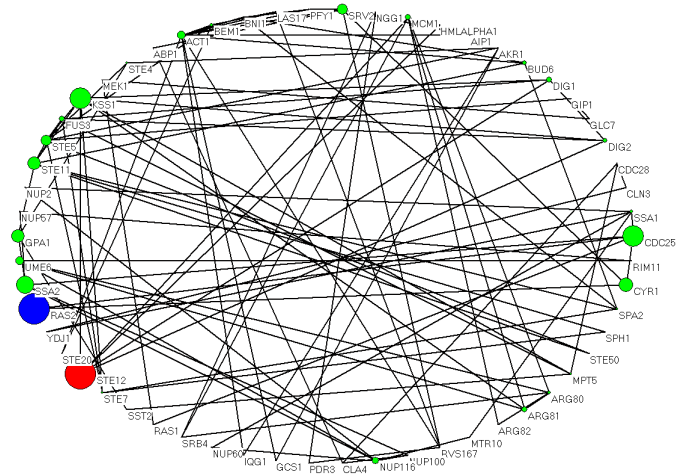

(a)  $\lambda=0$

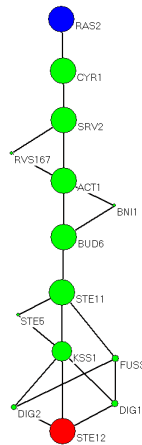

(b)  $\lambda=0.6$

Figure 7: Filamentation signaling networks generated based on integrated data, where blue circles are starting points and the red ones ending points. (a) STN extracted by ILP with  $\lambda=0$ , which contains 58 components; (b) STN extracted by ILP with  $\lambda=0.58$ , which contains 14 components.

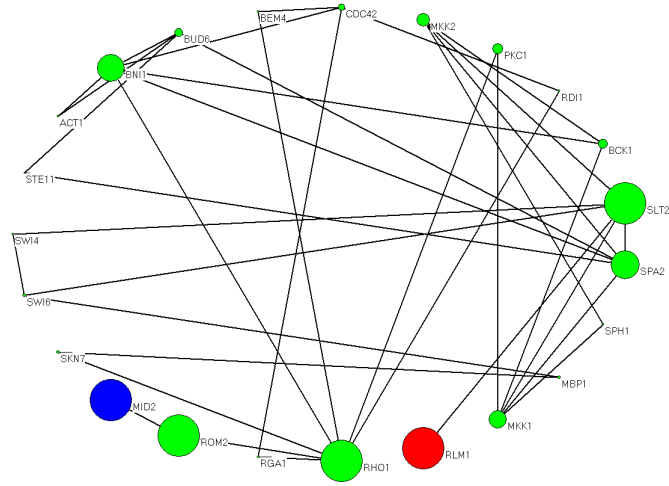

(a)  $\lambda=0$

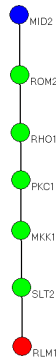

(b)  $\lambda=0.6$

Figure 8: Cell wall signaling networks generated based on integrated data, where blue circles are starting points and the red ones ending points. (a) STN extracted by ILP with  $\lambda=0.0$ , which contains 23 components;(b) STN extracted by ILP with  $\lambda=0.30$ , which contains 7 components.

The ranking list of possible HOG pathways of length 6-7 found by pariwise correlation in descending way

\*\*\*\*\*

|      |        |        |        |       |       |      |
|------|--------|--------|--------|-------|-------|------|
| SLN1 | RVS167 | RVS161 | CCT2   | STE4  | STE11 | HOG1 |
| SLN1 | RVS167 | SEC8   | SEC5   | SEC6  | VPS9  | HOG1 |
| SLN1 | RVS167 | SEC8   | SEC6   | SEC5  | VPS9  | HOG1 |
| SLN1 | RVS167 | SLA1   | YPT7   | YPT32 | STE11 | HOG1 |
| SLN1 | RVS167 | SWI4   | RVS161 | VPS21 | STE11 | HOG1 |
| SLN1 | RVS167 | RVS161 | SLA1   | BUD6  | STE11 | HOG1 |
| SLN1 | RVS167 | SLA1   | RVS161 | VPS21 | STE11 | HOG1 |
| SLN1 | RVS167 | RVS161 | CCT2   | KSS1  | STE11 | HOG1 |
| SLN1 | RVS167 | SWI4   | RVS161 | RUD3  | ARP6  | HOG1 |
| SLN1 | RVS167 | SLA1   | RVS161 | RUD3  | ARP6  | HOG1 |
| SLN1 | RVS167 | RVS161 | SWI4   | CHS5  | EMP24 | HOG1 |
| SLN1 | RVS167 | RVS161 | SWI4   | DEP1  | ARP6  | HOG1 |
| SLN1 | RVS167 | RVS161 | SWI4   | SLT2  | FUS3  | HOG1 |
| SLN1 | RVS167 | RVS161 | SWI4   | SLT2  | PTP3  | HOG1 |
| SLN1 | RVS167 | SWI4   | RVS161 | CHS5  | EMP24 | HOG1 |
| SLN1 | RVS167 | SWI4   | RVS161 | DEP1  | ARP6  | HOG1 |
| SLN1 | RVS167 | SWI4   | RVS161 | SLT2  | FUS3  | HOG1 |
| SLN1 | RVS167 | SWI4   | RVS161 | SLT2  | PTP3  | HOG1 |
| SLN1 | RVS167 | RVS161 | SLA1   | CHS5  | EMP24 | HOG1 |
| SLN1 | RVS167 | RVS161 | SLA1   | CTF4  | ARP6  | HOG1 |
| SLN1 | RVS167 | SLA1   | RVS161 | CHS5  | EMP24 | HOG1 |
| SLN1 | RVS167 | SLA1   | RVS161 | DEP1  | ARP6  | HOG1 |

|      |        |        |        |       |       |      |
|------|--------|--------|--------|-------|-------|------|
| SLN1 | RVS167 | SLA1   | RVS161 | SLT2  | FUS3  | HOG1 |
| SLN1 | RVS167 | SLA1   | RVS161 | SLT2  | PTP3  | HOG1 |
| SLN1 | YPD1   | SSK1   | CDC28  | BEM3  | STE11 | HOG1 |
| SLN1 | RVS167 | RVS161 | CCT2   | KSS1  | FUS3  | HOG1 |
| SLN1 | RVS167 | RVS161 | CCT2   | SIT4  | RCK2  | HOG1 |
| SLN1 | RVS167 | SLA1   | BEM1   | STE5  | STE11 | HOG1 |
| SLN1 | RVS167 | SLA1   | BZZ1   | SIP1  | SNF1  | HOG1 |
| SLN1 | RVS167 | SWI4   | CLA4   | BEM3  | STE11 | HOG1 |
| SLN1 | RVS167 | RVS161 | CYK3   | BMH1  | SNF1  | HOG1 |
| SLN1 | RVS167 | BEM1   | SLA1   | BUD6  | STE11 | HOG1 |
| SLN1 | RVS167 | SLA1   | BEM1   | BUD6  | STE11 | HOG1 |
| SLN1 | RVS167 | RVS161 | VPS21  | YPT32 | STE11 | HOG1 |
| SLN1 | YPD1   | SSK1   | CDC28  | BCK2  | STE11 | HOG1 |
| SLN1 | YPD1   | SSK1   | CDC28  | BUD6  | STE11 | HOG1 |
| SLN1 | YPD1   | SSK1   | CDC28  | SPA2  | STE11 | HOG1 |
| SLN1 | YPD1   | SSK1   | SSK2   | PBS2  | STE11 | HOG1 |
| SLN1 | RVS167 | SWI4   | BNI1   | YPT6  | ARP6  | HOG1 |
| SLN1 | RVS167 | SWI4   | SLT2   | YPT6  | ARP6  | HOG1 |
| SLN1 | RVS167 | SWI4   | SMI1   | YPT6  | ARP6  | HOG1 |
| SLN1 | RVS167 | BEM1   | STE5   | STE4  | STE11 | HOG1 |
| SLN1 | RVS167 | SLA1   | BNI1   | YPT6  | ARP6  | HOG1 |
| SLN1 | RVS167 | SLA1   | SMI1   | YPT6  | ARP6  | HOG1 |
| SLN1 | RVS167 | SLA1   | SYS1   | YPT6  | ARP6  | HOG1 |
| SLN1 | RVS167 | SLA1   | YPT7   | YPT6  | ARP6  | HOG1 |
| SLN1 | RVS167 | BZZ1   | SIP1   | BMH1  | SNF1  | HOG1 |

|      |        |      |       |       |       |      |
|------|--------|------|-------|-------|-------|------|
| SLN1 | RVS167 | CYK3 | BMH1  | SIP1  | SNF1  | HOG1 |
| SLN1 | RVS167 | BEM1 | AKR1  | STE4  | STE11 | HOG1 |
| SLN1 | RVS167 | BEM1 | CDC24 | STE4  | STE11 | HOG1 |
| SLN1 | RVS167 | BEM1 | FAR1  | STE4  | STE11 | HOG1 |
| SLN1 | RVS167 | SWI4 | BNI1  | BUD6  | STE11 | HOG1 |
| SLN1 | RVS167 | SWI4 | BNI1  | SPA2  | STE11 | HOG1 |
| SLN1 | RVS167 | SWI4 | CDC42 | BUD6  | STE11 | HOG1 |
| SLN1 | RVS167 | SWI4 | CDC42 | SPA2  | STE11 | HOG1 |
| SLN1 | RVS167 | SWI4 | CHS5  | VPS21 | STE11 | HOG1 |
| SLN1 | RVS167 | SWI4 | CLA4  | BUD6  | STE11 | HOG1 |
| SLN1 | RVS167 | SWI4 | CLA4  | SPA2  | STE11 | HOG1 |
| SLN1 | RVS167 | SWI4 | DEP1  | VPS21 | STE11 | HOG1 |
| SLN1 | RVS167 | SWI4 | SLT2  | FUS3  | STE11 | HOG1 |
| SLN1 | RVS167 | SWI4 | SLT2  | SPA2  | STE11 | HOG1 |
| SLN1 | RVS167 | SWI4 | SMI1  | BCK2  | STE11 | HOG1 |
| SLN1 | RVS167 | SWI4 | SMI1  | SPA2  | STE11 | HOG1 |
| SLN1 | RVS167 | SLA1 | CTF4  | MAD1  | ARP6  | HOG1 |
| SLN1 | RVS167 | RUD3 | YPT6  | YPT32 | STE11 | HOG1 |
| SLN1 | RVS167 | ABP1 | SLA1  | BUD6  | STE11 | HOG1 |
| SLN1 | RVS167 | AIP1 | SLA1  | BUD6  | STE11 | HOG1 |
| SLN1 | RVS167 | BZZ1 | SLA1  | BUD6  | STE11 | HOG1 |
| SLN1 | RVS167 | CHS5 | SLA1  | BUD6  | STE11 | HOG1 |
| SLN1 | RVS167 | CHS7 | SLA1  | BUD6  | STE11 | HOG1 |
| SLN1 | RVS167 | COF1 | SLA1  | BUD6  | STE11 | HOG1 |

|      |        |      |      |       |       |      |
|------|--------|------|------|-------|-------|------|
| SLN1 | RVS167 | CRN1 | SLA1 | BUD6  | STE11 | HOG1 |
| SLN1 | RVS167 | END3 | SLA1 | BUD6  | STE11 | HOG1 |
| SLN1 | RVS167 | GTS1 | SLA1 | BUD6  | STE11 | HOG1 |
| SLN1 | RVS167 | PAN1 | SLA1 | BUD6  | STE11 | HOG1 |
| SLN1 | RVS167 | PEP1 | SLA1 | BUD6  | STE11 | HOG1 |
| SLN1 | RVS167 | SAC6 | SLA1 | BUD6  | STE11 | HOG1 |
| SLN1 | RVS167 | SKT5 | SLA1 | BUD6  | STE11 | HOG1 |
| SLN1 | RVS167 | SLA1 | ABP1 | BUD6  | STE11 | HOG1 |
| SLN1 | RVS167 | SLA1 | AIP1 | BUD6  | STE11 | HOG1 |
| SLN1 | RVS167 | SLA1 | BNI1 | BUD6  | STE11 | HOG1 |
| SLN1 | RVS167 | SLA1 | BNI1 | SPA2  | STE11 | HOG1 |
| SLN1 | RVS167 | SLA1 | BUD6 | HSC82 | STE11 | HOG1 |
| SLN1 | RVS167 | SLA1 | BUD6 | SPA2  | STE11 | HOG1 |
| SLN1 | RVS167 | SLA1 | BUD6 | SPH1  | STE11 | HOG1 |
| SLN1 | RVS167 | SLA1 | BUD6 | STE11 | FUS3  | HOG1 |
| SLN1 | RVS167 | SLA1 | BUD6 | STE11 | HOG1  |      |
| SLN1 | RVS167 | SLA1 | BUD6 | STE11 | PBS2  | HOG1 |
| SLN1 | RVS167 | SLA1 | CHS5 | VPS21 | STE11 | HOG1 |
| SLN1 | RVS167 | SLA1 | COF1 | BUD6  | STE11 | HOG1 |
| SLN1 | RVS167 | SLA1 | CRN1 | BUD6  | STE11 | HOG1 |
| SLN1 | RVS167 | SLA1 | PAN1 | BUD6  | STE11 | HOG1 |
| SLN1 | RVS167 | SLA1 | PEP1 | DIG1  | STE11 | HOG1 |
| SLN1 | RVS167 | SLA1 | SAC6 | BUD6  | STE11 | HOG1 |
| SLN1 | RVS167 | SLA1 | SAC6 | VPS21 | STE11 | HOG1 |
| SLN1 | RVS167 | SLA1 | SLA2 | BUD6  | STE11 | HOG1 |

|      |        |         |       |       |       |      |
|------|--------|---------|-------|-------|-------|------|
| SLN1 | RVS167 | SLA1    | SMI1  | BCK2  | STE11 | HOG1 |
| SLN1 | RVS167 | SLA1    | SMI1  | SPA2  | STE11 | HOG1 |
| SLN1 | RVS167 | SLA1    | SRV2  | BUD6  | STE11 | HOG1 |
| SLN1 | RVS167 | SLA1    | YPT7  | VPS21 | STE11 | HOG1 |
| SLN1 | RVS167 | SLA2    | SLA1  | BUD6  | STE11 | HOG1 |
| SLN1 | RVS167 | SMI1    | SLA1  | BUD6  | STE11 | HOG1 |
| SLN1 | RVS167 | SRV2    | SLA1  | BUD6  | STE11 | HOG1 |
| SLN1 | RVS167 | YSC84   | SLA1  | BUD6  | STE11 | HOG1 |
| SLN1 | RVS167 | VPS21   | YPT32 | YPT52 | STE11 | HOG1 |
| SLN1 | RVS167 | VPS21   | YPT52 | YPT32 | STE11 | HOG1 |
| SLN1 | RVS167 | BEM1    | CDC28 | SSK1  | YPD1  | HOG1 |
| SLN1 | RVS167 | RVS161  | VPS21 | YPT52 | STE11 | HOG1 |
| SLN1 | RVS167 | SLT2    | YPT6  | YPT32 | STE11 | HOG1 |
| SLN1 | RVS167 | SMI1    | YPT6  | YPT32 | STE11 | HOG1 |
| SLN1 | RVS167 | SUM1    | YPT6  | YPT32 | STE11 | HOG1 |
| SLN1 | RVS167 | VPS21   | YPT6  | YPT32 | STE11 | HOG1 |
| SLN1 | RVS167 | SLA1    | BEM1  | STE5  | FUS3  | HOG1 |
| SLN1 | RVS167 | BZZ1    | PLP2  | STE4  | STE11 | HOG1 |
| SLN1 | RVS167 | YNL086W | STE50 | STE4  | STE11 | HOG1 |
| SLN1 | YPD1   | SSK2    | FAR1  | STE4  | STE11 | HOG1 |
| SLN1 | RVS167 | BZZ1    | SIP1  | SIP2  | SNF1  | HOG1 |
| SLN1 | YPD1   | SSK1    | CDC28 | KIN2  | HXK1  | HOG1 |
| SLN1 | RVS167 | BEM1    | SLA1  | CHS5  | EMP24 | HOG1 |
| SLN1 | RVS167 | BEM1    | SLA1  | CTF4  | ARP6  | HOG1 |



|      |        |       |        |       |       |      |
|------|--------|-------|--------|-------|-------|------|
| SLN1 | RVS167 | BEM1  | SEC15  | SEC5  | VPS9  | HOG1 |
| SLN1 | RVS167 | BEM1  | FAR1   | SEC6  | VPS9  | HOG1 |
| SLN1 | RVS167 | BEM1  | SEC15  | SEC6  | VPS9  | HOG1 |
| SLN1 | RVS167 | BEM1  | STE20  | SEC6  | VPS9  | HOG1 |
| SLN1 | RVS167 | RUD3  | YPT6   | YPT52 | STE11 | HOG1 |
| SLN1 | RVS167 | BUD6  | CDC28  | SSK1  | YPD1  | HOG1 |
| SLN1 | RVS167 | CLA4  | CDC28  | SSK1  | YPD1  | HOG1 |
| SLN1 | RVS167 | SLT2  | CDC28  | SSK1  | YPD1  | HOG1 |
| SLN1 | YPD1   | SSK1  | CDC28  | EX084 | VPS9  | HOG1 |
| SLN1 | YPD1   | SSK1  | CDC28  | HCM1  | ARP6  | HOG1 |
| SLN1 | YPD1   | SSK1  | CDC28  | SEC3  | VPS9  | HOG1 |
| SLN1 | YPD1   | SSK1  | CDC28  | SLT2  | FUS3  | HOG1 |
| SLN1 | YPD1   | SSK1  | CDC28  | SLT2  | PTP3  | HOG1 |
| SLN1 | YPD1   | SSK1  | HEX3   | CTF4  | ARP6  | HOG1 |
| SLN1 | YPD1   | SSK1  | HEX3   | SSK2  | PBS2  | HOG1 |
| SLN1 | YPD1   | SSK1  | SSK2   | PBS2  | HOG1  |      |
| SLN1 | YPD1   | SSK1  | SSK2   | PTC1  | PBS2  | HOG1 |
| SLN1 | RVS167 | SWI4  | SLT2   | KIN2  | H XK1 | HOG1 |
| SLN1 | RVS167 | CNA1  | RVS161 | VPS21 | STE11 | HOG1 |
| SLN1 | RVS167 | VPS21 | YPT31  | YPT32 | STE11 | HOG1 |
| SLN1 | RVS167 | CHS5  | SWI4   | DEP1  | ARP6  | HOG1 |
| SLN1 | RVS167 | CHS5  | SWI4   | SLT2  | FUS3  | HOG1 |
| SLN1 | RVS167 | CHS5  | SWI4   | SLT2  | PTP3  | HOG1 |
| SLN1 | RVS167 | CLA4  | SWI4   | CHS5  | EMP24 | HOG1 |
| SLN1 | RVS167 | CLA4  | SWI4   | DEP1  | ARP6  | HOG1 |

|      |        |      |       |       |       |      |
|------|--------|------|-------|-------|-------|------|
| SLN1 | RVS167 | CLA4 | SWI4  | SLT2  | FUS3  | HOG1 |
| SLN1 | RVS167 | CLA4 | SWI4  | SLT2  | PTP3  | HOG1 |
| SLN1 | RVS167 | DEP1 | SWI4  | CHS5  | EMP24 | HOG1 |
| SLN1 | RVS167 | DEP1 | SWI4  | SLT2  | FUS3  | HOG1 |
| SLN1 | RVS167 | DEP1 | SWI4  | SLT2  | PTP3  | HOG1 |
| SLN1 | RVS167 | SKT5 | SWI4  | CHS5  | EMP24 | HOG1 |
| SLN1 | RVS167 | SKT5 | SWI4  | DEP1  | ARP6  | HOG1 |
| SLN1 | RVS167 | SKT5 | SWI4  | SLT2  | FUS3  | HOG1 |
| SLN1 | RVS167 | SKT5 | SWI4  | SLT2  | PTP3  | HOG1 |
| SLN1 | RVS167 | SLT2 | SWI4  | CHS5  | EMP24 | HOG1 |
| SLN1 | RVS167 | SLT2 | SWI4  | DEP1  | ARP6  | HOG1 |
| SLN1 | RVS167 | SMI1 | SWI4  | CHS5  | EMP24 | HOG1 |
| SLN1 | RVS167 | SMI1 | SWI4  | DEP1  | ARP6  | HOG1 |
| SLN1 | RVS167 | SMI1 | SWI4  | SLT2  | FUS3  | HOG1 |
| SLN1 | RVS167 | SMI1 | SWI4  | SLT2  | PTP3  | HOG1 |
| SLN1 | RVS167 | SWI4 | BNI1  | CHS5  | EMP24 | HOG1 |
| SLN1 | RVS167 | SWI4 | BNI1  | NBP2  | PBS2  | HOG1 |
| SLN1 | RVS167 | SWI4 | BNI1  | SLT2  | FUS3  | HOG1 |
| SLN1 | RVS167 | SWI4 | BNI1  | SLT2  | PTP3  | HOG1 |
| SLN1 | RVS167 | SWI4 | CDC42 | SEC3  | VPS9  | HOG1 |
| SLN1 | RVS167 | SWI4 | CHS5  | EMP24 | HOG1  |      |
| SLN1 | RVS167 | SWI4 | CHS5  | SLT2  | FUS3  | HOG1 |
| SLN1 | RVS167 | SWI4 | CHS5  | SLT2  | PTP3  | HOG1 |
| SLN1 | RVS167 | SWI4 | CLA4  | CHS5  | EMP24 | HOG1 |

|      |        |      |       |      |         |      |
|------|--------|------|-------|------|---------|------|
| SLN1 | RVS167 | SWI4 | CLA4  | CTF4 | ARP6    | HOG1 |
| SLN1 | RVS167 | SWI4 | CLA4  | DEP1 | ARP6    | HOG1 |
| SLN1 | RVS167 | SWI4 | CLA4  | SLT2 | FUS3    | HOG1 |
| SLN1 | RVS167 | SWI4 | CLA4  | SLT2 | PTP3    | HOG1 |
| SLN1 | RVS167 | SWI4 | DEP1  | ARP6 | HOG1    |      |
| SLN1 | RVS167 | SWI4 | PH085 | SLT2 | FUS3    | HOG1 |
| SLN1 | RVS167 | SWI4 | PH085 | SLT2 | PTP3    | HOG1 |
| SLN1 | RVS167 | SWI4 | PH085 | SOV1 | PBS2    | HOG1 |
| SLN1 | RVS167 | SWI4 | PH085 | SOV1 | SNF1    | HOG1 |
| SLN1 | RVS167 | SWI4 | PH085 | TEM1 | YGR058W | HOG1 |
| SLN1 | RVS167 | SWI4 | SKT5  | SLT2 | FUS3    | HOG1 |
| SLN1 | RVS167 | SWI4 | SKT5  | SLT2 | PTP3    | HOG1 |
| SLN1 | RVS167 | SWI4 | SLT2  | CHS5 | EMP24   | HOG1 |
| SLN1 | RVS167 | SWI4 | SLT2  | FUS3 | HOG1    |      |
| SLN1 | RVS167 | SWI4 | SLT2  | FUS3 | PTP3    | HOG1 |
| SLN1 | RVS167 | SWI4 | SLT2  | FUS3 | RCK1    | HOG1 |
| SLN1 | RVS167 | SWI4 | SLT2  | FUS3 | SNF1    | HOG1 |
| SLN1 | RVS167 | SWI4 | SLT2  | MSG5 | FUS3    | HOG1 |
| SLN1 | RVS167 | SWI4 | SLT2  | PTC1 | PBS2    | HOG1 |
| SLN1 | RVS167 | SWI4 | SLT2  | PTP3 | FUS3    | HOG1 |
| SLN1 | RVS167 | SWI4 | SLT2  | PTP3 | HOG1    |      |
| SLN1 | RVS167 | SWI4 | SMI1  | CHS5 | EMP24   | HOG1 |
| SLN1 | RVS167 | SWI4 | SMI1  | CTF4 | ARP6    | HOG1 |
| SLN1 | RVS167 | SWI4 | SMI1  | NBP2 | PBS2    | HOG1 |
| SLN1 | RVS167 | SWI4 | SMI1  | PTC1 | PBS2    | HOG1 |

|      |        |       |       |       |       |      |
|------|--------|-------|-------|-------|-------|------|
| SLN1 | RVS167 | SWI4  | SMI1  | RIC1  | ARP6  | HOG1 |
| SLN1 | RVS167 | SWI4  | SMI1  | SLT2  | FUS3  | HOG1 |
| SLN1 | RVS167 | SWI4  | SMI1  | SLT2  | PTP3  | HOG1 |
| SLN1 | RVS167 | SWI4  | SWI6  | SLT2  | FUS3  | HOG1 |
| SLN1 | RVS167 | SWI4  | SWI6  | SLT2  | PTP3  | HOG1 |
| SLN1 | RVS167 | SLT2  | YPT6  | YPT52 | STE11 | HOG1 |
| SLN1 | RVS167 | SMI1  | YPT6  | YPT52 | STE11 | HOG1 |
| SLN1 | RVS167 | SUM1  | YPT6  | YPT52 | STE11 | HOG1 |
| SLN1 | RVS167 | VPS21 | YPT6  | YPT52 | STE11 | HOG1 |
| SLN1 | RVS167 | BEM1  | BOI2  | BMH1  | SNF1  | HOG1 |
| SLN1 | RVS167 | BEM1  | STE20 | BMH1  | SNF1  | HOG1 |
| SLN1 | RVS167 | ABP1  | SLA1  | CHS5  | EMP24 | HOG1 |
| SLN1 | RVS167 | ABP1  | SLA1  | CTF4  | ARP6  | HOG1 |
| SLN1 | RVS167 | AIP1  | SLA1  | CHS5  | EMP24 | HOG1 |
| SLN1 | RVS167 | AIP1  | SLA1  | CTF4  | ARP6  | HOG1 |
| SLN1 | RVS167 | BUD6  | SLA1  | CHS5  | EMP24 | HOG1 |
| SLN1 | RVS167 | BUD6  | SLA1  | CTF4  | ARP6  | HOG1 |
| SLN1 | RVS167 | BZZ1  | SLA1  | CHS5  | EMP24 | HOG1 |
| SLN1 | RVS167 | BZZ1  | SLA1  | CTF4  | ARP6  | HOG1 |
| SLN1 | RVS167 | CHS5  | SLA1  | CTF4  | ARP6  | HOG1 |
| SLN1 | RVS167 | CHS7  | SLA1  | CHS5  | EMP24 | HOG1 |
| SLN1 | RVS167 | CHS7  | SLA1  | CTF4  | ARP6  | HOG1 |
| SLN1 | RVS167 | COF1  | SLA1  | CHS5  | EMP24 | HOG1 |
| SLN1 | RVS167 | COF1  | SLA1  | CTF4  | ARP6  | HOG1 |

|      |        |      |      |       |         |      |
|------|--------|------|------|-------|---------|------|
| SLN1 | RVS167 | CRN1 | SLA1 | CHS5  | EMP24   | HOG1 |
| SLN1 | RVS167 | CRN1 | SLA1 | CTF4  | ARP6    | HOG1 |
| SLN1 | RVS167 | END3 | SLA1 | CHS5  | EMP24   | HOG1 |
| SLN1 | RVS167 | END3 | SLA1 | CTF4  | ARP6    | HOG1 |
| SLN1 | RVS167 | GTS1 | SLA1 | CHS5  | EMP24   | HOG1 |
| SLN1 | RVS167 | GTS1 | SLA1 | CTF4  | ARP6    | HOG1 |
| SLN1 | RVS167 | PAN1 | SLA1 | CHS5  | EMP24   | HOG1 |
| SLN1 | RVS167 | PAN1 | SLA1 | CTF4  | ARP6    | HOG1 |
| SLN1 | RVS167 | PEP1 | SLA1 | CHS5  | EMP24   | HOG1 |
| SLN1 | RVS167 | PEP1 | SLA1 | CTF4  | ARP6    | HOG1 |
| SLN1 | RVS167 | SAC6 | SLA1 | CHS5  | EMP24   | HOG1 |
| SLN1 | RVS167 | SAC6 | SLA1 | CTF4  | ARP6    | HOG1 |
| SLN1 | RVS167 | SKT5 | SLA1 | CHS5  | EMP24   | HOG1 |
| SLN1 | RVS167 | SKT5 | SLA1 | CTF4  | ARP6    | HOG1 |
| SLN1 | RVS167 | SLA1 | BNI1 | CHS5  | EMP24   | HOG1 |
| SLN1 | RVS167 | SLA1 | BNI1 | NBP2  | PBS2    | HOG1 |
| SLN1 | RVS167 | SLA1 | BNI1 | SLT2  | FUS3    | HOG1 |
| SLN1 | RVS167 | SLA1 | BNI1 | SLT2  | PTP3    | HOG1 |
| SLN1 | RVS167 | SLA1 | BUD6 | SPH1  | FUS3    | HOG1 |
| SLN1 | RVS167 | SLA1 | CHS5 | EMP24 | HOG1    |      |
| SLN1 | RVS167 | SLA1 | CHS5 | SLT2  | FUS3    | HOG1 |
| SLN1 | RVS167 | SLA1 | CHS5 | SLT2  | PTP3    | HOG1 |
| SLN1 | RVS167 | SLA1 | CHS7 | SLT2  | FUS3    | HOG1 |
| SLN1 | RVS167 | SLA1 | CHS7 | SLT2  | PTP3    | HOG1 |
| SLN1 | RVS167 | SLA1 | COF1 | TEM1  | YGR058W | HOG1 |

|      |        |      |      |       |       |      |
|------|--------|------|------|-------|-------|------|
| SLN1 | RVS167 | SLA1 | CTF4 | ARP6  | HOG1  |      |
| SLN1 | RVS167 | SLA1 | CTF4 | BUB1  | ARP6  | HOG1 |
| SLN1 | RVS167 | SLA1 | PEP1 | DIG1  | FUS3  | HOG1 |
| SLN1 | RVS167 | SLA1 | PRK1 | AKL1  | ARP6  | HOG1 |
| SLN1 | RVS167 | SLA1 | SAC6 | CHS5  | EMP24 | HOG1 |
| SLN1 | RVS167 | SLA1 | SKT5 | SLT2  | FUS3  | HOG1 |
| SLN1 | RVS167 | SLA1 | SKT5 | SLT2  | PTP3  | HOG1 |
| SLN1 | RVS167 | SLA1 | SMI1 | CHS5  | EMP24 | HOG1 |
| SLN1 | RVS167 | SLA1 | SMI1 | CTF4  | ARP6  | HOG1 |
| SLN1 | RVS167 | SLA1 | SMI1 | NBP2  | PBS2  | HOG1 |
| SLN1 | RVS167 | SLA1 | SMI1 | PTC1  | PBS2  | HOG1 |
| SLN1 | RVS167 | SLA1 | SMI1 | RIC1  | ARP6  | HOG1 |
| SLN1 | RVS167 | SLA1 | SMI1 | SLT2  | FUS3  | HOG1 |
| SLN1 | RVS167 | SLA1 | SMI1 | SLT2  | PTP3  | HOG1 |
| SLN1 | RVS167 | SLA1 | STM1 | CTF4  | ARP6  | HOG1 |
| SLN1 | RVS167 | SLA1 | STM1 | SEC23 | EMP24 | HOG1 |
| SLN1 | RVS167 | SLA1 | SYS1 | RIC1  | ARP6  | HOG1 |
| SLN1 | RVS167 | SLA1 | YPT7 | RIC1  | ARP6  | HOG1 |
| SLN1 | RVS167 | SLA2 | SLA1 | CHS5  | EMP24 | HOG1 |
| SLN1 | RVS167 | SLA2 | SLA1 | CTF4  | ARP6  | HOG1 |
| SLN1 | RVS167 | SMI1 | SLA1 | CHS5  | EMP24 | HOG1 |
| SLN1 | RVS167 | SMI1 | SLA1 | CTF4  | ARP6  | HOG1 |
| SLN1 | RVS167 | SRV2 | SLA1 | CHS5  | EMP24 | HOG1 |
| SLN1 | RVS167 | SRV2 | SLA1 | CTF4  | ARP6  | HOG1 |

|      |        |        |       |       |       |      |
|------|--------|--------|-------|-------|-------|------|
| SLN1 | RVS167 | YSC84  | SLA1  | CHS5  | EMP24 | HOG1 |
| SLN1 | RVS167 | YSC84  | SLA1  | CTF4  | ARP6  | HOG1 |
| SLN1 | RVS167 | BCK1   | SEC3  | SEC5  | VPS9  | HOG1 |
| SLN1 | RVS167 | ECM30  | SEC3  | SEC5  | VPS9  | HOG1 |
| SLN1 | RVS167 | SEC8   | EX084 | SEC5  | VPS9  | HOG1 |
| SLN1 | RVS167 | SEC8   | SEC15 | SEC5  | VPS9  | HOG1 |
| SLN1 | RVS167 | SEC8   | SEC3  | SEC5  | VPS9  | HOG1 |
| SLN1 | RVS167 | SEC8   | SEC5  | EX084 | VPS9  | HOG1 |
| SLN1 | RVS167 | SEC8   | SEC5  | SEC3  | VPS9  | HOG1 |
| SLN1 | RVS167 | SEC8   | SEC5  | VPS9  | HOG1  |      |
| SLN1 | RVS167 | BCK1   | SEC3  | SEC6  | VPS9  | HOG1 |
| SLN1 | RVS167 | CLA4   | STE20 | SEC6  | VPS9  | HOG1 |
| SLN1 | RVS167 | ECM30  | SEC3  | SEC6  | VPS9  | HOG1 |
| SLN1 | RVS167 | SEC8   | EX084 | SEC6  | VPS9  | HOG1 |
| SLN1 | RVS167 | SEC8   | SEC15 | SEC6  | VPS9  | HOG1 |
| SLN1 | RVS167 | SEC8   | SEC3  | SEC6  | VPS9  | HOG1 |
| SLN1 | RVS167 | SEC8   | SEC6  | EX084 | VPS9  | HOG1 |
| SLN1 | RVS167 | SEC8   | SEC6  | SEC3  | VPS9  | HOG1 |
| SLN1 | RVS167 | SEC8   | SEC6  | SOV1  | PBS2  | HOG1 |
| SLN1 | RVS167 | SEC8   | SEC6  | SOV1  | SNF1  | HOG1 |
| SLN1 | RVS167 | SEC8   | SEC6  | VPS9  | HOG1  |      |
| SLN1 | YPD1   | PBS2   | SOV1  | SEC6  | VPS9  | HOG1 |
| SLN1 | YPD1   | SSK2   | FAR1  | SEC6  | VPS9  | HOG1 |
| SLN1 | RVS167 | RVS161 | RUD3  | YPT6  | ARP6  | HOG1 |
| SLN1 | RVS167 | VPS21  | YPT1  | YPT32 | STE11 | HOG1 |

|      |        |        |        |         |       |      |
|------|--------|--------|--------|---------|-------|------|
| SLN1 | RVS167 | RVS161 | CLA4   | BEM3    | STE11 | HOG1 |
| SLN1 | RVS167 | VPS21  | YPT32  | YPT6    | ARP6  | HOG1 |
| SLN1 | RVS167 | RUD3   | RVS161 | VPS21   | STE11 | HOG1 |
| SLN1 | RVS167 | RVS161 | SLT2   | YPT6    | ARP6  | HOG1 |
| SLN1 | RVS167 | RVS161 | SUM1   | YPT6    | ARP6  | HOG1 |
| SLN1 | RVS167 | RVS161 | VPS21  | YPT6    | ARP6  | HOG1 |
| SLN1 | RVS167 | CLA4   | RPN10  | KSS1    | STE11 | HOG1 |
| SLN1 | RVS167 | CLA4   | RPN10  | YDR239C | STE11 | HOG1 |
| SLN1 | RVS167 | CLA4   | RPN10  | YPR115W | STE11 | HOG1 |
| SLN1 | RVS167 | DEP1   | RPN10  | KSS1    | STE11 | HOG1 |
| SLN1 | RVS167 | DEP1   | RPN10  | YDR239C | STE11 | HOG1 |
| SLN1 | RVS167 | DEP1   | RPN10  | YPR115W | STE11 | HOG1 |
| SLN1 | RVS167 | SMI1   | RPN10  | KSS1    | STE11 | HOG1 |
| SLN1 | RVS167 | SMI1   | RPN10  | YDR239C | STE11 | HOG1 |
| SLN1 | RVS167 | SMI1   | RPN10  | YPR115W | STE11 | HOG1 |
| SLN1 | RVS167 | CHS7   | CYK3   | BMH1    | SNF1  | HOG1 |
| SLN1 | RVS167 | CLA4   | BOI2   | BMH1    | SNF1  | HOG1 |
| SLN1 | RVS167 | CLA4   | STE20  | BMH1    | SNF1  | HOG1 |
| SLN1 | RVS167 | CRN1   | SVL3   | BMH1    | SNF1  | HOG1 |
| SLN1 | RVS167 | CYK3   | BMH1   | SEC23   | EMP24 | HOG1 |
| SLN1 | RVS167 | CYK3   | BMH1   | SNF1    | FUS3  | HOG1 |
| SLN1 | RVS167 | CYK3   | BMH1   | SNF1    | HOG1  |      |
| SLN1 | RVS167 | CYK3   | BMH1   | SNF1    | RCK1  | HOG1 |
| SLN1 | RVS167 | CYK3   | BMH1   | SNF4    | RCK1  | HOG1 |



|      |        |       |         |       |       |      |
|------|--------|-------|---------|-------|-------|------|
| SLN1 | RVS167 | CYK3  | BMH1    | SNF4  | SNF1  | HOG1 |
| SLN1 | RVS167 | CYK3  | BOI2    | BMH1  | SNF1  | HOG1 |
| SLN1 | RVS167 | CYK3  | CSR2    | BMH1  | SNF1  | HOG1 |
| SLN1 | RVS167 | CYK3  | KCS1    | BMH1  | SNF1  | HOG1 |
| SLN1 | RVS167 | CYK3  | SOK1    | BMH1  | SNF1  | HOG1 |
| SLN1 | RVS167 | CYK3  | SVL3    | BMH1  | SNF1  | HOG1 |
| SLN1 | RVS167 | CYK3  | YFR017C | BMH1  | SNF1  | HOG1 |
| SLN1 | RVS167 | CHS5  | VPS21   | YPT32 | STE11 | HOG1 |
| SLN1 | RVS167 | DEP1  | VPS21   | YPT32 | STE11 | HOG1 |
| SLN1 | RVS167 | SAC6  | VPS21   | YPT32 | STE11 | HOG1 |
| SLN1 | RVS167 | VPS21 | SEC4    | YPT32 | STE11 | HOG1 |
| SLN1 | RVS167 | VPS21 | YIF1    | YPT32 | STE11 | HOG1 |
| SLN1 | RVS167 | VPS21 | YPT32   | STE11 | FUS3  | HOG1 |
| SLN1 | RVS167 | VPS21 | YPT32   | STE11 | HOG1  |      |
| SLN1 | RVS167 | VPS21 | YPT32   | STE11 | PBS2  | HOG1 |
| SLN1 | RVS167 | VPS21 | YPT7    | YPT32 | STE11 | HOG1 |
| SLN1 | RVS167 | CNA1  | RVS161  | RUD3  | ARP6  | HOG1 |
| SLN1 | RVS167 | VPS21 | YPT31   | YPT52 | STE11 | HOG1 |
| SLN1 | RVS167 | BCK1  | RVS161  | VPS21 | STE11 | HOG1 |
| SLN1 | RVS167 | CHS5  | RVS161  | VPS21 | STE11 | HOG1 |
| SLN1 | RVS167 | CHS7  | RVS161  | VPS21 | STE11 | HOG1 |
| SLN1 | RVS167 | CLA4  | RVS161  | VPS21 | STE11 | HOG1 |
| SLN1 | RVS167 | CYK3  | RVS161  | VPS21 | STE11 | HOG1 |
| SLN1 | RVS167 | DEP1  | RVS161  | VPS21 | STE11 | HOG1 |
| SLN1 | RVS167 | END3  | RVS161  | VPS21 | STE11 | HOG1 |

|      |        |         |        |         |       |      |
|------|--------|---------|--------|---------|-------|------|
| SLN1 | RVS167 | MTH1    | RVS161 | VPS21   | STE11 | HOG1 |
| SLN1 | RVS167 | PDR3    | RVS161 | VPS21   | STE11 | HOG1 |
| SLN1 | RVS167 | RVS161  | BCK1   | YPR115W | STE11 | HOG1 |
| SLN1 | RVS167 | RVS161  | CHS5   | VPS21   | STE11 | HOG1 |
| SLN1 | RVS167 | RVS161  | CLA4   | BUD6    | STE11 | HOG1 |
| SLN1 | RVS167 | RVS161  | CLA4   | SPA2    | STE11 | HOG1 |
| SLN1 | RVS167 | RVS161  | DEP1   | VPS21   | STE11 | HOG1 |
| SLN1 | RVS167 | RVS161  | SLT2   | FUS3    | STE11 | HOG1 |
| SLN1 | RVS167 | RVS161  | SLT2   | SPA2    | STE11 | HOG1 |
| SLN1 | RVS167 | RVS161  | VPS21  | STE11   | FUS3  | HOG1 |
| SLN1 | RVS167 | RVS161  | VPS21  | STE11   | HOG1  |      |
| SLN1 | RVS167 | RVS161  | VPS21  | STE11   | PBS2  | HOG1 |
| SLN1 | RVS167 | SKT5    | RVS161 | VPS21   | STE11 | HOG1 |
| SLN1 | RVS167 | SLT2    | RVS161 | VPS21   | STE11 | HOG1 |
| SLN1 | RVS167 | SUM1    | RVS161 | VPS21   | STE11 | HOG1 |
| SLN1 | RVS167 | YBR255W | RVS161 | VPS21   | STE11 | HOG1 |
| SLN1 | RVS167 | YJR115W | RVS161 | VPS21   | STE11 | HOG1 |
| SLN1 | RVS167 | CNA1    | CMP2   | KIN2    | HXK1  | HOG1 |
| SLN1 | RVS167 | VPS21   | YPT1   | YPT52   | STE11 | HOG1 |
| SLN1 | RVS167 | CNA1    | RVS161 | CHS5    | EMP24 | HOG1 |
| SLN1 | RVS167 | CNA1    | RVS161 | DEP1    | ARP6  | HOG1 |
| SLN1 | RVS167 | CNA1    | RVS161 | SLT2    | FUS3  | HOG1 |
| SLN1 | RVS167 | CNA1    | RVS161 | SLT2    | PTP3  | HOG1 |
| SLN1 | RVS167 | VPS21   | YPT52  | YPT6    | ARP6  | HOG1 |

|      |        |       |        |       |       |      |
|------|--------|-------|--------|-------|-------|------|
| SLN1 | RVS167 | CLA4  | GIC1   | STE50 | STE11 | HOG1 |
| SLN1 | RVS167 | RUD3  | YPT6   | VPS21 | STE11 | HOG1 |
| SLN1 | RVS167 | CHS5  | VPS21  | YPT52 | STE11 | HOG1 |
| SLN1 | RVS167 | COF1  | TEM1   | YPT52 | STE11 | HOG1 |
| SLN1 | RVS167 | DEP1  | VPS21  | YPT52 | STE11 | HOG1 |
| SLN1 | RVS167 | SAC6  | VPS21  | YPT52 | STE11 | HOG1 |
| SLN1 | RVS167 | VPS21 | SEC4   | YPT52 | STE11 | HOG1 |
| SLN1 | RVS167 | VPS21 | YIF1   | YPT52 | STE11 | HOG1 |
| SLN1 | RVS167 | VPS21 | YPT52  | STE11 | FUS3  | HOG1 |
| SLN1 | RVS167 | VPS21 | YPT52  | STE11 | HOG1  |      |
| SLN1 | RVS167 | VPS21 | YPT52  | STE11 | PBS2  | HOG1 |
| SLN1 | RVS167 | VPS21 | YPT53  | YPT52 | STE11 | HOG1 |
| SLN1 | RVS167 | BCK1  | RVS161 | RUD3  | ARP6  | HOG1 |
| SLN1 | RVS167 | CHS5  | RVS161 | RUD3  | ARP6  | HOG1 |
| SLN1 | RVS167 | CHS7  | RVS161 | RUD3  | ARP6  | HOG1 |
| SLN1 | RVS167 | CLA4  | RVS161 | RUD3  | ARP6  | HOG1 |
| SLN1 | RVS167 | CYK3  | RVS161 | RUD3  | ARP6  | HOG1 |
| SLN1 | RVS167 | DEP1  | RVS161 | RUD3  | ARP6  | HOG1 |
| SLN1 | RVS167 | END3  | RVS161 | RUD3  | ARP6  | HOG1 |
| SLN1 | RVS167 | MTH1  | RVS161 | RUD3  | ARP6  | HOG1 |
| SLN1 | RVS167 | PDR3  | RVS161 | RUD3  | ARP6  | HOG1 |
| SLN1 | RVS167 | RUD3  | RVS161 | CHS5  | EMP24 | HOG1 |
| SLN1 | RVS167 | RUD3  | RVS161 | DEP1  | ARP6  | HOG1 |
| SLN1 | RVS167 | RUD3  | RVS161 | SLT2  | FUS3  | HOG1 |
| SLN1 | RVS167 | RUD3  | RVS161 | SLT2  | PTP3  | HOG1 |

|      |        |         |        |       |       |      |
|------|--------|---------|--------|-------|-------|------|
| SLN1 | RVS167 | RVS161  | RUD3   | ARP6  | HOG1  |      |
| SLN1 | RVS167 | RVS161  | RUD3   | RIC1  | ARP6  | HOG1 |
| SLN1 | RVS167 | SKT5    | RVS161 | RUD3  | ARP6  | HOG1 |
| SLN1 | RVS167 | SLT2    | RVS161 | RUD3  | ARP6  | HOG1 |
| SLN1 | RVS167 | SUM1    | RVS161 | RUD3  | ARP6  | HOG1 |
| SLN1 | RVS167 | VPS21   | RVS161 | RUD3  | ARP6  | HOG1 |
| SLN1 | RVS167 | YBR255W | RVS161 | RUD3  | ARP6  | HOG1 |
| SLN1 | RVS167 | YJR115W | RVS161 | RUD3  | ARP6  | HOG1 |
| SLN1 | RVS167 | SLT2    | YPT6   | VPS21 | STE11 | HOG1 |
| SLN1 | RVS167 | SMI1    | YPT6   | VPS21 | STE11 | HOG1 |
| SLN1 | RVS167 | SUM1    | YPT6   | VPS21 | STE11 | HOG1 |
| SLN1 | RVS167 | RVS161  | BCK1   | KIN2  | HXK1  | HOG1 |
| SLN1 | RVS167 | RVS161  | SLT2   | KIN2  | HXK1  | HOG1 |
| SLN1 | RVS167 | CLA4    | RPN10  | CTF4  | ARP6  | HOG1 |
| SLN1 | RVS167 | CLA4    | RPN10  | DEP1  | ARP6  | HOG1 |
| SLN1 | RVS167 | CLA4    | RPN10  | KSS1  | FUS3  | HOG1 |
| SLN1 | RVS167 | DEP1    | RPN10  | CTF4  | ARP6  | HOG1 |
| SLN1 | RVS167 | DEP1    | RPN10  | KSS1  | FUS3  | HOG1 |
| SLN1 | RVS167 | SMI1    | RPN10  | CTF4  | ARP6  | HOG1 |
| SLN1 | RVS167 | SMI1    | RPN10  | DEP1  | ARP6  | HOG1 |
| SLN1 | RVS167 | SMI1    | RPN10  | KSS1  | FUS3  | HOG1 |
| SLN1 | RVS167 | BCK1    | CMP2   | KIN2  | HXK1  | HOG1 |
| SLN1 | RVS167 | BCK1    | RVS161 | CHS5  | EMP24 | HOG1 |
| SLN1 | RVS167 | BCK1    | RVS161 | DEP1  | ARP6  | HOG1 |

|      |        |      |        |      |       |      |
|------|--------|------|--------|------|-------|------|
| SLN1 | RVS167 | BCK1 | RVS161 | SLT2 | FUS3  | HOG1 |
| SLN1 | RVS167 | BCK1 | RVS161 | SLT2 | PTP3  | HOG1 |
| SLN1 | RVS167 | CHS5 | RVS161 | DEP1 | ARP6  | HOG1 |
| SLN1 | RVS167 | CHS5 | RVS161 | SLT2 | FUS3  | HOG1 |
| SLN1 | RVS167 | CHS5 | RVS161 | SLT2 | PTP3  | HOG1 |
| SLN1 | RVS167 | CHS7 | RVS161 | CHS5 | EMP24 | HOG1 |
| SLN1 | RVS167 | CHS7 | RVS161 | DEP1 | ARP6  | HOG1 |
| SLN1 | RVS167 | CHS7 | RVS161 | SLT2 | FUS3  | HOG1 |
| SLN1 | RVS167 | CHS7 | RVS161 | SLT2 | PTP3  | HOG1 |
| SLN1 | RVS167 | CLA4 | RVS161 | CHS5 | EMP24 | HOG1 |
| SLN1 | RVS167 | CLA4 | RVS161 | DEP1 | ARP6  | HOG1 |
| SLN1 | RVS167 | CLA4 | RVS161 | SLT2 | FUS3  | HOG1 |
| SLN1 | RVS167 | CLA4 | RVS161 | SLT2 | PTP3  | HOG1 |
| SLN1 | RVS167 | CYK3 | RVS161 | CHS5 | EMP24 | HOG1 |
| SLN1 | RVS167 | CYK3 | RVS161 | DEP1 | ARP6  | HOG1 |
| SLN1 | RVS167 | CYK3 | RVS161 | SLT2 | FUS3  | HOG1 |
| SLN1 | RVS167 | CYK3 | RVS161 | SLT2 | PTP3  | HOG1 |
| SLN1 | RVS167 | DEP1 | RVS161 | CHS5 | EMP24 | HOG1 |
| SLN1 | RVS167 | DEP1 | RVS161 | SLT2 | FUS3  | HOG1 |
| SLN1 | RVS167 | DEP1 | RVS161 | SLT2 | PTP3  | HOG1 |
| SLN1 | RVS167 | END3 | RVS161 | CHS5 | EMP24 | HOG1 |
| SLN1 | RVS167 | END3 | RVS161 | DEP1 | ARP6  | HOG1 |
| SLN1 | RVS167 | END3 | RVS161 | SLT2 | FUS3  | HOG1 |
| SLN1 | RVS167 | END3 | RVS161 | SLT2 | PTP3  | HOG1 |
| SLN1 | RVS167 | MTH1 | RVS161 | CHS5 | EMP24 | HOG1 |

|      |        |        |        |       |         |      |
|------|--------|--------|--------|-------|---------|------|
| SLN1 | RVS167 | MTH1   | RVS161 | DEP1  | ARP6    | HOG1 |
| SLN1 | RVS167 | MTH1   | RVS161 | SLT2  | FUS3    | HOG1 |
| SLN1 | RVS167 | MTH1   | RVS161 | SLT2  | PTP3    | HOG1 |
| SLN1 | RVS167 | PDR3   | RVS161 | CHS5  | EMP24   | HOG1 |
| SLN1 | RVS167 | PDR3   | RVS161 | DEP1  | ARP6    | HOG1 |
| SLN1 | RVS167 | PDR3   | RVS161 | SLT2  | FUS3    | HOG1 |
| SLN1 | RVS167 | PDR3   | RVS161 | SLT2  | PTP3    | HOG1 |
| SLN1 | RVS167 | RVS161 | BCK1   | CHS5  | EMP24   | HOG1 |
| SLN1 | RVS167 | RVS161 | BCK1   | HKR1  | EMP24   | HOG1 |
| SLN1 | RVS167 | RVS161 | BCK1   | LAS21 | YPR045C | HOG1 |
| SLN1 | RVS167 | RVS161 | BCK1   | SEC3  | VPS9    | HOG1 |
| SLN1 | RVS167 | RVS161 | BCK1   | SLT2  | FUS3    | HOG1 |
| SLN1 | RVS167 | RVS161 | BCK1   | SLT2  | PTP3    | HOG1 |
| SLN1 | RVS167 | RVS161 | CHS5   | EMP24 | HOG1    |      |
| SLN1 | RVS167 | RVS161 | CHS5   | SLT2  | FUS3    | HOG1 |
| SLN1 | RVS167 | RVS161 | CHS5   | SLT2  | PTP3    | HOG1 |
| SLN1 | RVS167 | RVS161 | CHS7   | SLT2  | FUS3    | HOG1 |
| SLN1 | RVS167 | RVS161 | CHS7   | SLT2  | PTP3    | HOG1 |
| SLN1 | RVS167 | RVS161 | CLA4   | CHS5  | EMP24   | HOG1 |
| SLN1 | RVS167 | RVS161 | CLA4   | CTF4  | ARP6    | HOG1 |
| SLN1 | RVS167 | RVS161 | CLA4   | DEP1  | ARP6    | HOG1 |
| SLN1 | RVS167 | RVS161 | CLA4   | SLT2  | FUS3    | HOG1 |
| SLN1 | RVS167 | RVS161 | CLA4   | SLT2  | PTP3    | HOG1 |
| SLN1 | RVS167 | RVS161 | DEP1   | ARP6  | HOG1    |      |

|      |        |        |         |      |         |      |
|------|--------|--------|---------|------|---------|------|
| SLN1 | RVS167 | RVS161 | SKT5    | SLT2 | FUS3    | HOG1 |
| SLN1 | RVS167 | RVS161 | SKT5    | SLT2 | PTP3    | HOG1 |
| SLN1 | RVS167 | RVS161 | SLT2    | CHS5 | EMP24   | HOG1 |
| SLN1 | RVS167 | RVS161 | SLT2    | FUS3 | HOG1    |      |
| SLN1 | RVS167 | RVS161 | SLT2    | FUS3 | PTP3    | HOG1 |
| SLN1 | RVS167 | RVS161 | SLT2    | FUS3 | RCK1    | HOG1 |
| SLN1 | RVS167 | RVS161 | SLT2    | FUS3 | SNF1    | HOG1 |
| SLN1 | RVS167 | RVS161 | SLT2    | MSG5 | FUS3    | HOG1 |
| SLN1 | RVS167 | RVS161 | SLT2    | PTC1 | PBS2    | HOG1 |
| SLN1 | RVS167 | RVS161 | SLT2    | PTP3 | FUS3    | HOG1 |
| SLN1 | RVS167 | RVS161 | SLT2    | PTP3 | HOG1    |      |
| SLN1 | RVS167 | RVS161 | VPS21   | CHS5 | EMP24   | HOG1 |
| SLN1 | RVS167 | RVS161 | VPS21   | DEP1 | ARP6    | HOG1 |
| SLN1 | RVS167 | RVS161 | VPS21   | RIC1 | ARP6    | HOG1 |
| SLN1 | RVS167 | RVS161 | YCR076C | TEM1 | YGR058W | HOG1 |
| SLN1 | RVS167 | SKT5   | RVS161  | CHS5 | EMP24   | HOG1 |
| SLN1 | RVS167 | SKT5   | RVS161  | DEP1 | ARP6    | HOG1 |
| SLN1 | RVS167 | SKT5   | RVS161  | SLT2 | FUS3    | HOG1 |
| SLN1 | RVS167 | SKT5   | RVS161  | SLT2 | PTP3    | HOG1 |
| SLN1 | RVS167 | SLT2   | RVS161  | CHS5 | EMP24   | HOG1 |
| SLN1 | RVS167 | SLT2   | RVS161  | DEP1 | ARP6    | HOG1 |
| SLN1 | RVS167 | SUM1   | RVS161  | CHS5 | EMP24   | HOG1 |
| SLN1 | RVS167 | SUM1   | RVS161  | DEP1 | ARP6    | HOG1 |
| SLN1 | RVS167 | SUM1   | RVS161  | SLT2 | FUS3    | HOG1 |
| SLN1 | RVS167 | SUM1   | RVS161  | SLT2 | PTP3    | HOG1 |

|      |        |         |         |      |       |      |
|------|--------|---------|---------|------|-------|------|
| SLN1 | RVS167 | VPS21   | RVS161  | CHS5 | EMP24 | HOG1 |
| SLN1 | RVS167 | VPS21   | RVS161  | DEP1 | ARP6  | HOG1 |
| SLN1 | RVS167 | VPS21   | RVS161  | SLT2 | FUS3  | HOG1 |
| SLN1 | RVS167 | VPS21   | RVS161  | SLT2 | PTP3  | HOG1 |
| SLN1 | RVS167 | YBR255W | RVS161  | CHS5 | EMP24 | HOG1 |
| SLN1 | RVS167 | YBR255W | RVS161  | DEP1 | ARP6  | HOG1 |
| SLN1 | RVS167 | YBR255W | RVS161  | SLT2 | FUS3  | HOG1 |
| SLN1 | RVS167 | YBR255W | RVS161  | SLT2 | PTP3  | HOG1 |
| SLN1 | RVS167 | YJR115W | RVS161  | CHS5 | EMP24 | HOG1 |
| SLN1 | RVS167 | YJR115W | RVS161  | DEP1 | ARP6  | HOG1 |
| SLN1 | RVS167 | YJR115W | RVS161  | SLT2 | FUS3  | HOG1 |
| SLN1 | RVS167 | YJR115W | RVS161  | SLT2 | PTP3  | HOG1 |
| SLN1 | RVS167 | BEM1    | CDC28   | BEM3 | STE11 | HOG1 |
| SLN1 | RVS167 | BEM1    | CLA4    | BEM3 | STE11 | HOG1 |
| SLN1 | RVS167 | CNA1    | CNB1    | YPT6 | ARP6  | HOG1 |
| SLN1 | RVS167 | VPS21   | YPT31   | YPT6 | ARP6  | HOG1 |
| SLN1 | RVS167 | BEM1    | BNI1    | YPT6 | ARP6  | HOG1 |
| SLN1 | RVS167 | BEM1    | CNB1    | YPT6 | ARP6  | HOG1 |
| SLN1 | RVS167 | BEM1    | SMI1    | YPT6 | ARP6  | HOG1 |
| SLN1 | RVS167 | BEM1    | YEL043W | YPT6 | ARP6  | HOG1 |
| SLN1 | RVS167 | VPS21   | YPT1    | YPT6 | ARP6  | HOG1 |
| SLN1 | RVS167 | DEP1    | HIR1    | HIR2 | SNF1  | HOG1 |
| SLN1 | RVS167 | ABP1    | BEM1    | STE5 | STE11 | HOG1 |
| SLN1 | RVS167 | AIP1    | BEM1    | STE5 | STE11 | HOG1 |



|      |        |      |      |       |       |      |
|------|--------|------|------|-------|-------|------|
| SLN1 | RVS167 | BEM1 | AKR1 | STE5  | STE11 | HOG1 |
| SLN1 | RVS167 | BEM1 | STE5 | FUS3  | STE11 | HOG1 |
| SLN1 | RVS167 | BEM1 | STE5 | KSS1  | STE11 | HOG1 |
| SLN1 | RVS167 | BEM1 | STE5 | STE11 | FUS3  | HOG1 |
| SLN1 | RVS167 | BEM1 | STE5 | STE11 | HOG1  |      |
| SLN1 | RVS167 | BEM1 | STE5 | STE11 | PBS2  | HOG1 |
| SLN1 | RVS167 | BEM1 | STE5 | STE50 | STE11 | HOG1 |
| SLN1 | RVS167 | BEM1 | STE5 | STE7  | STE11 | HOG1 |
| SLN1 | RVS167 | BUD6 | BEM1 | STE5  | STE11 | HOG1 |
| SLN1 | RVS167 | CLA4 | BEM1 | STE5  | STE11 | HOG1 |
| SLN1 | RVS167 | COF1 | BEM1 | STE5  | STE11 | HOG1 |
| SLN1 | RVS167 | CRN1 | BEM1 | STE5  | STE11 | HOG1 |
| SLN1 | RVS167 | PAN1 | BEM1 | STE5  | STE11 | HOG1 |
| SLN1 | RVS167 | SAC6 | BEM1 | STE5  | STE11 | HOG1 |
| SLN1 | RVS167 | SLA2 | BEM1 | STE5  | STE11 | HOG1 |
| SLN1 | RVS167 | SMI1 | BEM1 | STE5  | STE11 | HOG1 |
| SLN1 | RVS167 | SRV2 | BEM1 | STE5  | STE11 | HOG1 |
| SLN1 | RVS167 | BZZ1 | SIP1 | SIP4  | SNF1  | HOG1 |
| SLN1 | RVS167 | BZZ1 | SIP1 | SNF1  | FUS3  | HOG1 |
| SLN1 | RVS167 | BZZ1 | SIP1 | SNF1  | HOG1  |      |
| SLN1 | RVS167 | BZZ1 | SIP1 | SNF1  | RCK1  | HOG1 |
| SLN1 | RVS167 | BZZ1 | SIP1 | SNF4  | RCK1  | HOG1 |
| SLN1 | RVS167 | BZZ1 | SIP1 | SNF4  | SNF1  | HOG1 |
| SLN1 | RVS167 | PEP1 | BZZ1 | SIP1  | SNF1  | HOG1 |
| SLN1 | RVS167 | SLF1 | BZZ1 | SIP1  | SNF1  | HOG1 |

|      |        |       |         |      |       |      |
|------|--------|-------|---------|------|-------|------|
| SLN1 | RVS167 | YSC84 | BZZ1    | SIP1 | SNF1  | HOG1 |
| SLN1 | RVS167 | RUD3  | RIC1    | YPT6 | ARP6  | HOG1 |
| SLN1 | RVS167 | RUD3  | YPT6    | ARP6 | HOG1  |      |
| SLN1 | RVS167 | RUD3  | YPT6    | NBP2 | PBS2  | HOG1 |
| SLN1 | RVS167 | RUD3  | YPT6    | PTC1 | PBS2  | HOG1 |
| SLN1 | RVS167 | RUD3  | YPT6    | RIC1 | ARP6  | HOG1 |
| SLN1 | RVS167 | RUD3  | YPT6    | SLT2 | FUS3  | HOG1 |
| SLN1 | RVS167 | RUD3  | YPT6    | SLT2 | PTP3  | HOG1 |
| SLN1 | RVS167 | RUD3  | YPT6    | SNF4 | RCK1  | HOG1 |
| SLN1 | RVS167 | RUD3  | YPT6    | SNF4 | SNF1  | HOG1 |
| SLN1 | RVS167 | SLT2  | YPT6    | RUD3 | ARP6  | HOG1 |
| SLN1 | RVS167 | SMI1  | YPT6    | RUD3 | ARP6  | HOG1 |
| SLN1 | RVS167 | SUM1  | YPT6    | RUD3 | ARP6  | HOG1 |
| SLN1 | RVS167 | VPS21 | YPT6    | RUD3 | ARP6  | HOG1 |
| SLN1 | RVS167 | ABP1  | CLA4    | BEM3 | STE11 | HOG1 |
| SLN1 | RVS167 | BCK1  | CLA4    | BEM3 | STE11 | HOG1 |
| SLN1 | RVS167 | BCK1  | YPR115W | BEM3 | STE11 | HOG1 |
| SLN1 | RVS167 | BUD6  | CDC28   | BEM3 | STE11 | HOG1 |
| SLN1 | RVS167 | BUD6  | CLA4    | BEM3 | STE11 | HOG1 |
| SLN1 | RVS167 | CHS5  | BEM4    | BEM3 | STE11 | HOG1 |
| SLN1 | RVS167 | CHS5  | CLA4    | BEM3 | STE11 | HOG1 |
| SLN1 | RVS167 | CHS7  | CLA4    | BEM3 | STE11 | HOG1 |
| SLN1 | RVS167 | CLA4  | BEM3    | BCK2 | STE11 | HOG1 |
| SLN1 | RVS167 | CLA4  | BEM3    | DIG1 | STE11 | HOG1 |

|      |        |       |         |         |       |      |
|------|--------|-------|---------|---------|-------|------|
| SLN1 | RVS167 | CLA4  | BEM3    | KSS1    | STE11 | HOG1 |
| SLN1 | RVS167 | CLA4  | BEM3    | STE11   | FUS3  | HOG1 |
| SLN1 | RVS167 | CLA4  | BEM3    | STE11   | HOG1  |      |
| SLN1 | RVS167 | CLA4  | BEM3    | STE11   | PBS2  | HOG1 |
| SLN1 | RVS167 | CLA4  | BEM3    | STE12   | STE11 | HOG1 |
| SLN1 | RVS167 | CLA4  | BEM3    | STE7    | STE11 | HOG1 |
| SLN1 | RVS167 | CLA4  | BEM3    | YDR239C | STE11 | HOG1 |
| SLN1 | RVS167 | CLA4  | BEM3    | YPR115W | STE11 | HOG1 |
| SLN1 | RVS167 | CLA4  | BEM4    | BEM3    | STE11 | HOG1 |
| SLN1 | RVS167 | CLA4  | CDC28   | BEM3    | STE11 | HOG1 |
| SLN1 | RVS167 | CLA4  | ZDS2    | BEM3    | STE11 | HOG1 |
| SLN1 | RVS167 | DEP1  | CLA4    | BEM3    | STE11 | HOG1 |
| SLN1 | RVS167 | ECM30 | YPR115W | BEM3    | STE11 | HOG1 |
| SLN1 | RVS167 | PEP1  | DIG1    | BEM3    | STE11 | HOG1 |
| SLN1 | RVS167 | SKT5  | CLA4    | BEM3    | STE11 | HOG1 |
| SLN1 | RVS167 | SLA2  | CLA4    | BEM3    | STE11 | HOG1 |
| SLN1 | RVS167 | SLT2  | CDC28   | BEM3    | STE11 | HOG1 |
| SLN1 | RVS167 | SLT2  | CLA4    | BEM3    | STE11 | HOG1 |
| SLN1 | RVS167 | SMI1  | BCK2    | BEM3    | STE11 | HOG1 |
| SLN1 | RVS167 | SMI1  | CLA4    | BEM3    | STE11 | HOG1 |
| SLN1 | RVS167 | ABP1  | BEM1    | BUD6    | STE11 | HOG1 |
| SLN1 | RVS167 | AIP1  | BEM1    | BUD6    | STE11 | HOG1 |
| SLN1 | RVS167 | BEM1  | ABP1    | BUD6    | STE11 | HOG1 |
| SLN1 | RVS167 | BEM1  | AIP1    | BUD6    | STE11 | HOG1 |
| SLN1 | RVS167 | BEM1  | AKR1    | STE18   | STE11 | HOG1 |

|      |        |      |       |       |       |      |
|------|--------|------|-------|-------|-------|------|
| SLN1 | RVS167 | BEM1 | BNI1  | BUD6  | STE11 | HOG1 |
| SLN1 | RVS167 | BEM1 | BNI1  | SPA2  | STE11 | HOG1 |
| SLN1 | RVS167 | BEM1 | BUD6  | HSC82 | STE11 | HOG1 |
| SLN1 | RVS167 | BEM1 | BUD6  | SPA2  | STE11 | HOG1 |
| SLN1 | RVS167 | BEM1 | BUD6  | SPH1  | STE11 | HOG1 |
| SLN1 | RVS167 | BEM1 | BUD6  | STE11 | FUS3  | HOG1 |
| SLN1 | RVS167 | BEM1 | BUD6  | STE11 | HOG1  |      |
| SLN1 | RVS167 | BEM1 | BUD6  | STE11 | PBS2  | HOG1 |
| SLN1 | RVS167 | BEM1 | CDC28 | BCK2  | STE11 | HOG1 |
| SLN1 | RVS167 | BEM1 | CDC28 | BUD6  | STE11 | HOG1 |
| SLN1 | RVS167 | BEM1 | CDC28 | SPA2  | STE11 | HOG1 |
| SLN1 | RVS167 | BEM1 | CDC42 | BUD6  | STE11 | HOG1 |
| SLN1 | RVS167 | BEM1 | CDC42 | SPA2  | STE11 | HOG1 |
| SLN1 | RVS167 | BEM1 | CLA4  | BUD6  | STE11 | HOG1 |
| SLN1 | RVS167 | BEM1 | CLA4  | SPA2  | STE11 | HOG1 |
| SLN1 | RVS167 | BEM1 | COF1  | BUD6  | STE11 | HOG1 |
| SLN1 | RVS167 | BEM1 | CRN1  | BUD6  | STE11 | HOG1 |
| SLN1 | RVS167 | BEM1 | PAN1  | BUD6  | STE11 | HOG1 |
| SLN1 | RVS167 | BEM1 | SAC6  | BUD6  | STE11 | HOG1 |
| SLN1 | RVS167 | BEM1 | SAC6  | VPS21 | STE11 | HOG1 |
| SLN1 | RVS167 | BEM1 | SEC15 | STE50 | STE11 | HOG1 |
| SLN1 | RVS167 | BEM1 | SLA2  | BUD6  | STE11 | HOG1 |
| SLN1 | RVS167 | BEM1 | SMI1  | BCK2  | STE11 | HOG1 |
| SLN1 | RVS167 | BEM1 | SMI1  | SPA2  | STE11 | HOG1 |

|      |        |       |       |       |         |      |
|------|--------|-------|-------|-------|---------|------|
| SLN1 | RVS167 | BEM1  | SRV2  | BUD6  | STE11   | HOG1 |
| SLN1 | RVS167 | CLA4  | BEM1  | BUD6  | STE11   | HOG1 |
| SLN1 | RVS167 | COF1  | BEM1  | BUD6  | STE11   | HOG1 |
| SLN1 | RVS167 | CRN1  | BEM1  | BUD6  | STE11   | HOG1 |
| SLN1 | RVS167 | PAN1  | BEM1  | BUD6  | STE11   | HOG1 |
| SLN1 | RVS167 | SAC6  | BEM1  | BUD6  | STE11   | HOG1 |
| SLN1 | RVS167 | SLA2  | BEM1  | BUD6  | STE11   | HOG1 |
| SLN1 | RVS167 | SMI1  | BEM1  | BUD6  | STE11   | HOG1 |
| SLN1 | RVS167 | SRV2  | BEM1  | BUD6  | STE11   | HOG1 |
| SLN1 | RVS167 | VPS21 | YPT52 | TEM1  | YGR058W | HOG1 |
| SLN1 | RVS167 | RUD3  | RIC1  | VPS21 | STE11   | HOG1 |
| SLN1 | RVS167 | BCK1  | BNI1  | YPT6  | ARP6    | HOG1 |
| SLN1 | RVS167 | BCK1  | SLT2  | YPT6  | ARP6    | HOG1 |
| SLN1 | RVS167 | BCK1  | SMI1  | YPT6  | ARP6    | HOG1 |
| SLN1 | RVS167 | BUD6  | BNI1  | YPT6  | ARP6    | HOG1 |
| SLN1 | RVS167 | BZZ1  | IMH1  | YPT6  | ARP6    | HOG1 |
| SLN1 | RVS167 | BZZ1  | PER1  | YPT6  | ARP6    | HOG1 |
| SLN1 | RVS167 | CHS5  | BEM4  | YPT6  | ARP6    | HOG1 |
| SLN1 | RVS167 | CHS5  | BNI1  | YPT6  | ARP6    | HOG1 |
| SLN1 | RVS167 | CHS5  | SLT2  | YPT6  | ARP6    | HOG1 |
| SLN1 | RVS167 | CHS5  | SMI1  | YPT6  | ARP6    | HOG1 |
| SLN1 | RVS167 | CHS5  | VPS21 | YPT6  | ARP6    | HOG1 |
| SLN1 | RVS167 | CHS7  | BNI1  | YPT6  | ARP6    | HOG1 |
| SLN1 | RVS167 | CHS7  | SLT2  | YPT6  | ARP6    | HOG1 |
| SLN1 | RVS167 | CHS7  | SMI1  | YPT6  | ARP6    | HOG1 |

|      |        |      |       |      |      |      |
|------|--------|------|-------|------|------|------|
| SLN1 | RVS167 | CLA4 | BEM4  | YPT6 | ARP6 | HOG1 |
| SLN1 | RVS167 | CLA4 | BNI1  | YPT6 | ARP6 | HOG1 |
| SLN1 | RVS167 | CLA4 | SLT2  | YPT6 | ARP6 | HOG1 |
| SLN1 | RVS167 | CLA4 | SMI1  | YPT6 | ARP6 | HOG1 |
| SLN1 | RVS167 | CYK3 | BNI1  | YPT6 | ARP6 | HOG1 |
| SLN1 | RVS167 | DEP1 | VMA21 | YPT6 | ARP6 | HOG1 |
| SLN1 | RVS167 | DEP1 | VMA22 | YPT6 | ARP6 | HOG1 |
| SLN1 | RVS167 | DEP1 | VPS21 | YPT6 | ARP6 | HOG1 |
| SLN1 | RVS167 | SAC6 | VPS21 | YPT6 | ARP6 | HOG1 |
| SLN1 | RVS167 | SKT5 | BNI1  | YPT6 | ARP6 | HOG1 |
| SLN1 | RVS167 | SKT5 | SLT2  | YPT6 | ARP6 | HOG1 |
| SLN1 | RVS167 | SKT5 | SMI1  | YPT6 | ARP6 | HOG1 |
| SLN1 | RVS167 | SLT2 | BNI1  | YPT6 | ARP6 | HOG1 |
| SLN1 | RVS167 | SLT2 | PTC1  | YPT6 | ARP6 | HOG1 |
| SLN1 | RVS167 | SLT2 | SMI1  | YPT6 | ARP6 | HOG1 |
| SLN1 | RVS167 | SLT2 | YPT6  | ARP6 | HOG1 |      |
| SLN1 | RVS167 | SLT2 | YPT6  | NBP2 | PBS2 | HOG1 |
| SLN1 | RVS167 | SLT2 | YPT6  | PTC1 | PBS2 | HOG1 |
| SLN1 | RVS167 | SLT2 | YPT6  | RIC1 | ARP6 | HOG1 |
| SLN1 | RVS167 | SLT2 | YPT6  | SNF4 | RCK1 | HOG1 |
| SLN1 | RVS167 | SLT2 | YPT6  | SNF4 | SNF1 | HOG1 |
| SLN1 | RVS167 | SMI1 | BNI1  | YPT6 | ARP6 | HOG1 |
| SLN1 | RVS167 | SMI1 | CNB1  | YPT6 | ARP6 | HOG1 |
| SLN1 | RVS167 | SMI1 | NBP2  | YPT6 | ARP6 | HOG1 |

|      |        |       |      |      |      |      |
|------|--------|-------|------|------|------|------|
| SLN1 | RVS167 | SMI1  | PTC1 | YPT6 | ARP6 | HOG1 |
| SLN1 | RVS167 | SMI1  | RIC1 | YPT6 | ARP6 | HOG1 |
| SLN1 | RVS167 | SMI1  | SLT2 | YPT6 | ARP6 | HOG1 |
| SLN1 | RVS167 | SMI1  | YPT6 | ARP6 | HOG1 |      |
| SLN1 | RVS167 | SMI1  | YPT6 | NBP2 | PBS2 | HOG1 |
| SLN1 | RVS167 | SMI1  | YPT6 | PTC1 | PBS2 | HOG1 |
| SLN1 | RVS167 | SMI1  | YPT6 | RIC1 | ARP6 | HOG1 |
| SLN1 | RVS167 | SMI1  | YPT6 | SLT2 | FUS3 | HOG1 |
| SLN1 | RVS167 | SMI1  | YPT6 | SLT2 | PTP3 | HOG1 |
| SLN1 | RVS167 | SMI1  | YPT6 | SNF4 | RCK1 | HOG1 |
| SLN1 | RVS167 | SMI1  | YPT6 | SNF4 | SNF1 | HOG1 |
| SLN1 | RVS167 | SUM1  | ARL3 | YPT6 | ARP6 | HOG1 |
| SLN1 | RVS167 | SUM1  | YPT6 | ARP6 | HOG1 |      |
| SLN1 | RVS167 | SUM1  | YPT6 | NBP2 | PBS2 | HOG1 |
| SLN1 | RVS167 | SUM1  | YPT6 | PTC1 | PBS2 | HOG1 |
| SLN1 | RVS167 | SUM1  | YPT6 | RIC1 | ARP6 | HOG1 |
| SLN1 | RVS167 | SUM1  | YPT6 | SLT2 | FUS3 | HOG1 |
| SLN1 | RVS167 | SUM1  | YPT6 | SLT2 | PTP3 | HOG1 |
| SLN1 | RVS167 | SUM1  | YPT6 | SNF4 | RCK1 | HOG1 |
| SLN1 | RVS167 | SUM1  | YPT6 | SNF4 | SNF1 | HOG1 |
| SLN1 | RVS167 | VPS21 | RIC1 | YPT6 | ARP6 | HOG1 |
| SLN1 | RVS167 | VPS21 | SEC4 | YPT6 | ARP6 | HOG1 |
| SLN1 | RVS167 | VPS21 | YIF1 | YPT6 | ARP6 | HOG1 |
| SLN1 | RVS167 | VPS21 | YPT6 | ARP6 | HOG1 |      |
| SLN1 | RVS167 | VPS21 | YPT6 | NBP2 | PBS2 | HOG1 |

|      |        |         |       |       |       |      |
|------|--------|---------|-------|-------|-------|------|
| SLN1 | RVS167 | VPS21   | YPT6  | PTC1  | PBS2  | HOG1 |
| SLN1 | RVS167 | VPS21   | YPT6  | RIC1  | ARP6  | HOG1 |
| SLN1 | RVS167 | VPS21   | YPT6  | SLT2  | FUS3  | HOG1 |
| SLN1 | RVS167 | VPS21   | YPT6  | SLT2  | PTP3  | HOG1 |
| SLN1 | RVS167 | VPS21   | YPT6  | SNF4  | RCK1  | HOG1 |
| SLN1 | RVS167 | VPS21   | YPT6  | SNF4  | SNF1  | HOG1 |
| SLN1 | RVS167 | VPS21   | YPT7  | YPT6  | ARP6  | HOG1 |
| SLN1 | RVS167 | YSC84   | SYS1  | YPT6  | ARP6  | HOG1 |
| SLN1 | YPD1   | PBS2    | NBP2  | YPT6  | ARP6  | HOG1 |
| SLN1 | YPD1   | PBS2    | PTC1  | YPT6  | ARP6  | HOG1 |
| SLN1 | YPD1   | SSK2    | PTC1  | YPT6  | ARP6  | HOG1 |
| SLN1 | RVS167 | BUD6    | STE11 | STE5  | FUS3  | HOG1 |
| SLN1 | RVS167 | SLT2    | FUS3  | STE5  | STE11 | HOG1 |
| SLN1 | RVS167 | VPS21   | STE11 | STE5  | FUS3  | HOG1 |
| SLN1 | RVS167 | YNL086W | STE50 | STE5  | STE11 | HOG1 |
| SLN1 | YPD1   | PBS2    | STE11 | STE5  | FUS3  | HOG1 |
| SLN1 | RVS167 | CLA4    | CTF4  | MAD1  | ARP6  | HOG1 |
| SLN1 | RVS167 | SMI1    | CTF4  | MAD1  | ARP6  | HOG1 |
| SLN1 | RVS167 | ABP1    | AIP1  | BUD6  | STE11 | HOG1 |
| SLN1 | RVS167 | ABP1    | BUD6  | HSC82 | STE11 | HOG1 |
| SLN1 | RVS167 | ABP1    | BUD6  | SPA2  | STE11 | HOG1 |
| SLN1 | RVS167 | ABP1    | BUD6  | SPH1  | STE11 | HOG1 |
| SLN1 | RVS167 | ABP1    | BUD6  | STE11 | FUS3  | HOG1 |
| SLN1 | RVS167 | ABP1    | BUD6  | STE11 | HOG1  |      |



|      |        |      |      |       |       |      |
|------|--------|------|------|-------|-------|------|
| SLN1 | RVS167 | ABP1 | BUD6 | STE11 | PBS2  | HOG1 |
| SLN1 | RVS167 | ABP1 | CLA4 | BUD6  | STE11 | HOG1 |
| SLN1 | RVS167 | ABP1 | CLA4 | SPA2  | STE11 | HOG1 |
| SLN1 | RVS167 | ABP1 | COF1 | BUD6  | STE11 | HOG1 |
| SLN1 | RVS167 | ABP1 | CRN1 | BUD6  | STE11 | HOG1 |
| SLN1 | RVS167 | ABP1 | PAN1 | BUD6  | STE11 | HOG1 |
| SLN1 | RVS167 | ABP1 | SAC6 | BUD6  | STE11 | HOG1 |
| SLN1 | RVS167 | ABP1 | SAC6 | VPS21 | STE11 | HOG1 |
| SLN1 | RVS167 | ABP1 | SLA2 | BUD6  | STE11 | HOG1 |
| SLN1 | RVS167 | ABP1 | SRV2 | BUD6  | STE11 | HOG1 |
| SLN1 | RVS167 | AIP1 | ABP1 | BUD6  | STE11 | HOG1 |
| SLN1 | RVS167 | AIP1 | BUD6 | HSC82 | STE11 | HOG1 |
| SLN1 | RVS167 | AIP1 | BUD6 | SPA2  | STE11 | HOG1 |
| SLN1 | RVS167 | AIP1 | BUD6 | SPH1  | STE11 | HOG1 |
| SLN1 | RVS167 | AIP1 | BUD6 | STE11 | FUS3  | HOG1 |
| SLN1 | RVS167 | AIP1 | BUD6 | STE11 | HOG1  |      |
| SLN1 | RVS167 | AIP1 | BUD6 | STE11 | PBS2  | HOG1 |
| SLN1 | RVS167 | AIP1 | COF1 | BUD6  | STE11 | HOG1 |
| SLN1 | RVS167 | AIP1 | CRN1 | BUD6  | STE11 | HOG1 |
| SLN1 | RVS167 | AIP1 | PAN1 | BUD6  | STE11 | HOG1 |
| SLN1 | RVS167 | AIP1 | SAC6 | BUD6  | STE11 | HOG1 |
| SLN1 | RVS167 | AIP1 | SAC6 | VPS21 | STE11 | HOG1 |
| SLN1 | RVS167 | AIP1 | SLA2 | BUD6  | STE11 | HOG1 |
| SLN1 | RVS167 | AIP1 | SRV2 | BUD6  | STE11 | HOG1 |
| SLN1 | RVS167 | BCK1 | BNI1 | BUD6  | STE11 | HOG1 |

|      |        |      |         |         |       |      |
|------|--------|------|---------|---------|-------|------|
| SLN1 | RVS167 | BCK1 | BNI1    | SPA2    | STE11 | HOG1 |
| SLN1 | RVS167 | BCK1 | CHS5    | VPS21   | STE11 | HOG1 |
| SLN1 | RVS167 | BCK1 | CLA4    | BUD6    | STE11 | HOG1 |
| SLN1 | RVS167 | BCK1 | CLA4    | SPA2    | STE11 | HOG1 |
| SLN1 | RVS167 | BCK1 | ECM30   | YPR115W | STE11 | HOG1 |
| SLN1 | RVS167 | BCK1 | IML1    | YPR115W | STE11 | HOG1 |
| SLN1 | RVS167 | BCK1 | MKK1    | SPA2    | STE11 | HOG1 |
| SLN1 | RVS167 | BCK1 | MKK1    | SPH1    | STE11 | HOG1 |
| SLN1 | RVS167 | BCK1 | MKK2    | SPA2    | STE11 | HOG1 |
| SLN1 | RVS167 | BCK1 | MKK2    | SPH1    | STE11 | HOG1 |
| SLN1 | RVS167 | BCK1 | SEC3    | YPR115W | STE11 | HOG1 |
| SLN1 | RVS167 | BCK1 | SLT2    | FUS3    | STE11 | HOG1 |
| SLN1 | RVS167 | BCK1 | SLT2    | SPA2    | STE11 | HOG1 |
| SLN1 | RVS167 | BCK1 | SMI1    | BCK2    | STE11 | HOG1 |
| SLN1 | RVS167 | BCK1 | SMI1    | SPA2    | STE11 | HOG1 |
| SLN1 | RVS167 | BCK1 | YBL044W | YPR115W | STE11 | HOG1 |
| SLN1 | RVS167 | BCK1 | YJR098C | YPR115W | STE11 | HOG1 |
| SLN1 | RVS167 | BCK1 | YPR115W | DIG1    | STE11 | HOG1 |
| SLN1 | RVS167 | BCK1 | YPR115W | KSS1    | STE11 | HOG1 |
| SLN1 | RVS167 | BCK1 | YPR115W | STE11   | FUS3  | HOG1 |
| SLN1 | RVS167 | BCK1 | YPR115W | STE11   | HOG1  |      |
| SLN1 | RVS167 | BCK1 | YPR115W | STE11   | PBS2  | HOG1 |
| SLN1 | RVS167 | BCK1 | YPR115W | STE12   | STE11 | HOG1 |
| SLN1 | RVS167 | BCK1 | YPR115W | STE7    | STE11 | HOG1 |

|      |        |      |         |         |       |      |
|------|--------|------|---------|---------|-------|------|
| SLN1 | RVS167 | BCK1 | YPR115W | TEC1    | STE11 | HOG1 |
| SLN1 | RVS167 | BCK1 | YPR115W | YDR239C | STE11 | HOG1 |
| SLN1 | RVS167 | BUD6 | BNI1    | SPA2    | STE11 | HOG1 |
| SLN1 | RVS167 | BUD6 | CDC28   | BCK2    | STE11 | HOG1 |
| SLN1 | RVS167 | BUD6 | CDC28   | SPA2    | STE11 | HOG1 |
| SLN1 | RVS167 | BUD6 | CDC42   | SPA2    | STE11 | HOG1 |
| SLN1 | RVS167 | BUD6 | CLA4    | SPA2    | STE11 | HOG1 |
| SLN1 | RVS167 | BUD6 | HSC82   | STE11   | FUS3  | HOG1 |
| SLN1 | RVS167 | BUD6 | HSC82   | STE11   | HOG1  |      |
| SLN1 | RVS167 | BUD6 | HSC82   | STE11   | PBS2  | HOG1 |
| SLN1 | RVS167 | BUD6 | SAC6    | VPS21   | STE11 | HOG1 |
| SLN1 | RVS167 | BUD6 | SPA2    | STE11   | FUS3  | HOG1 |
| SLN1 | RVS167 | BUD6 | SPA2    | STE11   | HOG1  |      |
| SLN1 | RVS167 | BUD6 | SPA2    | STE11   | PBS2  | HOG1 |
| SLN1 | RVS167 | BUD6 | SPA2    | STE7    | STE11 | HOG1 |
| SLN1 | RVS167 | BUD6 | SPH1    | FUS3    | STE11 | HOG1 |
| SLN1 | RVS167 | BUD6 | SPH1    | STE11   | FUS3  | HOG1 |
| SLN1 | RVS167 | BUD6 | SPH1    | STE11   | HOG1  |      |
| SLN1 | RVS167 | BUD6 | SPH1    | STE11   | PBS2  | HOG1 |
| SLN1 | RVS167 | BUD6 | SPH1    | STE7    | STE11 | HOG1 |
| SLN1 | RVS167 | BUD6 | STE11   | DIG1    | FUS3  | HOG1 |
| SLN1 | RVS167 | BUD6 | STE11   | FUS3    | HOG1  |      |
| SLN1 | RVS167 | BUD6 | STE11   | FUS3    | PTP3  | HOG1 |
| SLN1 | RVS167 | BUD6 | STE11   | FUS3    | RCK1  | HOG1 |
| SLN1 | RVS167 | BUD6 | STE11   | FUS3    | SNF1  | HOG1 |

|      |        |      |       |         |       |      |
|------|--------|------|-------|---------|-------|------|
| SLN1 | RVS167 | BUD6 | STE11 | GPA1    | FUS3  | HOG1 |
| SLN1 | RVS167 | BUD6 | STE11 | KSS1    | FUS3  | HOG1 |
| SLN1 | RVS167 | BUD6 | STE11 | PBS2    | HOG1  |      |
| SLN1 | RVS167 | BUD6 | STE11 | PBS2    | YPD1  | HOG1 |
| SLN1 | RVS167 | BUD6 | STE11 | SPH1    | FUS3  | HOG1 |
| SLN1 | RVS167 | BUD6 | STE11 | STE7    | FUS3  | HOG1 |
| SLN1 | RVS167 | BZZ1 | PEP1  | DIG1    | STE11 | HOG1 |
| SLN1 | RVS167 | CHS5 | BCK1  | YPR115W | STE11 | HOG1 |
| SLN1 | RVS167 | CHS5 | BNI1  | BUD6    | STE11 | HOG1 |
| SLN1 | RVS167 | CHS5 | BNI1  | SPA2    | STE11 | HOG1 |
| SLN1 | RVS167 | CHS5 | CLA4  | BUD6    | STE11 | HOG1 |
| SLN1 | RVS167 | CHS5 | CLA4  | SPA2    | STE11 | HOG1 |
| SLN1 | RVS167 | CHS5 | PEA2  | SPA2    | STE11 | HOG1 |
| SLN1 | RVS167 | CHS5 | SAC6  | BUD6    | STE11 | HOG1 |
| SLN1 | RVS167 | CHS5 | SAC6  | VPS21   | STE11 | HOG1 |
| SLN1 | RVS167 | CHS5 | SLT2  | FUS3    | STE11 | HOG1 |
| SLN1 | RVS167 | CHS5 | SLT2  | SPA2    | STE11 | HOG1 |
| SLN1 | RVS167 | CHS5 | SMI1  | BCK2    | STE11 | HOG1 |
| SLN1 | RVS167 | CHS5 | SMI1  | SPA2    | STE11 | HOG1 |
| SLN1 | RVS167 | CHS5 | VPS21 | STE11   | FUS3  | HOG1 |
| SLN1 | RVS167 | CHS5 | VPS21 | STE11   | HOG1  |      |
| SLN1 | RVS167 | CHS5 | VPS21 | STE11   | PBS2  | HOG1 |
| SLN1 | RVS167 | CHS7 | BCK1  | YPR115W | STE11 | HOG1 |
| SLN1 | RVS167 | CHS7 | BNI1  | BUD6    | STE11 | HOG1 |

|      |        |      |       |         |       |      |
|------|--------|------|-------|---------|-------|------|
| SLN1 | RVS167 | CHS7 | BNI1  | SPA2    | STE11 | HOG1 |
| SLN1 | RVS167 | CHS7 | CLA4  | BUD6    | STE11 | HOG1 |
| SLN1 | RVS167 | CHS7 | CLA4  | SPA2    | STE11 | HOG1 |
| SLN1 | RVS167 | CHS7 | SAC6  | BUD6    | STE11 | HOG1 |
| SLN1 | RVS167 | CHS7 | SAC6  | VPS21   | STE11 | HOG1 |
| SLN1 | RVS167 | CHS7 | SLT2  | FUS3    | STE11 | HOG1 |
| SLN1 | RVS167 | CHS7 | SLT2  | SPA2    | STE11 | HOG1 |
| SLN1 | RVS167 | CHS7 | SMI1  | BCK2    | STE11 | HOG1 |
| SLN1 | RVS167 | CHS7 | SMI1  | SPA2    | STE11 | HOG1 |
| SLN1 | RVS167 | CLA4 | ABP1  | BUD6    | STE11 | HOG1 |
| SLN1 | RVS167 | CLA4 | BCK1  | YPR115W | STE11 | HOG1 |
| SLN1 | RVS167 | CLA4 | BNI1  | BUD6    | STE11 | HOG1 |
| SLN1 | RVS167 | CLA4 | BNI1  | SPA2    | STE11 | HOG1 |
| SLN1 | RVS167 | CLA4 | BUD6  | HSC82   | STE11 | HOG1 |
| SLN1 | RVS167 | CLA4 | BUD6  | SPA2    | STE11 | HOG1 |
| SLN1 | RVS167 | CLA4 | BUD6  | SPH1    | STE11 | HOG1 |
| SLN1 | RVS167 | CLA4 | BUD6  | STE11   | FUS3  | HOG1 |
| SLN1 | RVS167 | CLA4 | BUD6  | STE11   | HOG1  |      |
| SLN1 | RVS167 | CLA4 | BUD6  | STE11   | PBS2  | HOG1 |
| SLN1 | RVS167 | CLA4 | CDC28 | BCK2    | STE11 | HOG1 |
| SLN1 | RVS167 | CLA4 | CDC28 | BUD6    | STE11 | HOG1 |
| SLN1 | RVS167 | CLA4 | CDC28 | SPA2    | STE11 | HOG1 |
| SLN1 | RVS167 | CLA4 | CDC42 | BUD6    | STE11 | HOG1 |
| SLN1 | RVS167 | CLA4 | CDC42 | SPA2    | STE11 | HOG1 |
| SLN1 | RVS167 | CLA4 | CHS5  | VPS21   | STE11 | HOG1 |

|      |        |      |      |       |       |      |
|------|--------|------|------|-------|-------|------|
| SLN1 | RVS167 | CLA4 | DEP1 | VPS21 | STE11 | HOG1 |
| SLN1 | RVS167 | CLA4 | GIC2 | STE50 | STE11 | HOG1 |
| SLN1 | RVS167 | CLA4 | PEA2 | SPA2  | STE11 | HOG1 |
| SLN1 | RVS167 | CLA4 | SLA2 | BUD6  | STE11 | HOG1 |
| SLN1 | RVS167 | CLA4 | SLT2 | FUS3  | STE11 | HOG1 |
| SLN1 | RVS167 | CLA4 | SLT2 | SPA2  | STE11 | HOG1 |
| SLN1 | RVS167 | CLA4 | SMI1 | BCK2  | STE11 | HOG1 |
| SLN1 | RVS167 | CLA4 | SMI1 | SPA2  | STE11 | HOG1 |
| SLN1 | RVS167 | CLA4 | SPA2 | BUD6  | STE11 | HOG1 |
| SLN1 | RVS167 | CLA4 | SPA2 | STE11 | FUS3  | HOG1 |
| SLN1 | RVS167 | CLA4 | SPA2 | STE11 | HOG1  |      |
| SLN1 | RVS167 | CLA4 | SPA2 | STE11 | PBS2  | HOG1 |
| SLN1 | RVS167 | CLA4 | SPA2 | STE7  | STE11 | HOG1 |
| SLN1 | RVS167 | COF1 | ABP1 | BUD6  | STE11 | HOG1 |
| SLN1 | RVS167 | COF1 | AIP1 | BUD6  | STE11 | HOG1 |
| SLN1 | RVS167 | COF1 | BUD6 | HSC82 | STE11 | HOG1 |
| SLN1 | RVS167 | COF1 | BUD6 | SPA2  | STE11 | HOG1 |
| SLN1 | RVS167 | COF1 | BUD6 | SPH1  | STE11 | HOG1 |
| SLN1 | RVS167 | COF1 | BUD6 | STE11 | FUS3  | HOG1 |
| SLN1 | RVS167 | COF1 | BUD6 | STE11 | HOG1  |      |
| SLN1 | RVS167 | COF1 | BUD6 | STE11 | PBS2  | HOG1 |
| SLN1 | RVS167 | COF1 | CRN1 | BUD6  | STE11 | HOG1 |
| SLN1 | RVS167 | COF1 | PAN1 | BUD6  | STE11 | HOG1 |
| SLN1 | RVS167 | COF1 | SAC6 | BUD6  | STE11 | HOG1 |

|      |        |      |       |       |       |      |
|------|--------|------|-------|-------|-------|------|
| SLN1 | RVS167 | COF1 | SAC6  | VPS21 | STE11 | HOG1 |
| SLN1 | RVS167 | COF1 | SLA2  | BUD6  | STE11 | HOG1 |
| SLN1 | RVS167 | COF1 | SRV2  | BUD6  | STE11 | HOG1 |
| SLN1 | RVS167 | COF1 | TEM1  | DIG1  | STE11 | HOG1 |
| SLN1 | RVS167 | CRN1 | ABP1  | BUD6  | STE11 | HOG1 |
| SLN1 | RVS167 | CRN1 | AIP1  | BUD6  | STE11 | HOG1 |
| SLN1 | RVS167 | CRN1 | BUD6  | HSC82 | STE11 | HOG1 |
| SLN1 | RVS167 | CRN1 | BUD6  | SPA2  | STE11 | HOG1 |
| SLN1 | RVS167 | CRN1 | BUD6  | SPH1  | STE11 | HOG1 |
| SLN1 | RVS167 | CRN1 | BUD6  | STE11 | FUS3  | HOG1 |
| SLN1 | RVS167 | CRN1 | BUD6  | STE11 | HOG1  |      |
| SLN1 | RVS167 | CRN1 | BUD6  | STE11 | PBS2  | HOG1 |
| SLN1 | RVS167 | CRN1 | COF1  | BUD6  | STE11 | HOG1 |
| SLN1 | RVS167 | CRN1 | PAN1  | BUD6  | STE11 | HOG1 |
| SLN1 | RVS167 | CRN1 | SAC6  | BUD6  | STE11 | HOG1 |
| SLN1 | RVS167 | CRN1 | SAC6  | VPS21 | STE11 | HOG1 |
| SLN1 | RVS167 | CRN1 | SLA2  | BUD6  | STE11 | HOG1 |
| SLN1 | RVS167 | CRN1 | SRV2  | BUD6  | STE11 | HOG1 |
| SLN1 | RVS167 | CYK3 | BNI1  | BUD6  | STE11 | HOG1 |
| SLN1 | RVS167 | CYK3 | BNI1  | SPA2  | STE11 | HOG1 |
| SLN1 | RVS167 | DEP1 | CLA4  | BUD6  | STE11 | HOG1 |
| SLN1 | RVS167 | DEP1 | CLA4  | SPA2  | STE11 | HOG1 |
| SLN1 | RVS167 | DEP1 | VPS21 | STE11 | FUS3  | HOG1 |
| SLN1 | RVS167 | DEP1 | VPS21 | STE11 | HOG1  |      |
| SLN1 | RVS167 | DEP1 | VPS21 | STE11 | PBS2  | HOG1 |

|      |        |       |         |         |       |      |
|------|--------|-------|---------|---------|-------|------|
| SLN1 | RVS167 | ECM30 | BCK1    | YPR115W | STE11 | HOG1 |
| SLN1 | RVS167 | ECM30 | IML1    | YPR115W | STE11 | HOG1 |
| SLN1 | RVS167 | ECM30 | SEC3    | YPR115W | STE11 | HOG1 |
| SLN1 | RVS167 | ECM30 | YBL044W | YPR115W | STE11 | HOG1 |
| SLN1 | RVS167 | ECM30 | YJR098C | YPR115W | STE11 | HOG1 |
| SLN1 | RVS167 | ECM30 | YPR115W | DIG1    | STE11 | HOG1 |
| SLN1 | RVS167 | ECM30 | YPR115W | KSS1    | STE11 | HOG1 |
| SLN1 | RVS167 | ECM30 | YPR115W | STE11   | FUS3  | HOG1 |
| SLN1 | RVS167 | ECM30 | YPR115W | STE11   | HOG1  |      |
| SLN1 | RVS167 | ECM30 | YPR115W | STE11   | PBS2  | HOG1 |
| SLN1 | RVS167 | ECM30 | YPR115W | STE12   | STE11 | HOG1 |
| SLN1 | RVS167 | ECM30 | YPR115W | STE7    | STE11 | HOG1 |
| SLN1 | RVS167 | ECM30 | YPR115W | TEC1    | STE11 | HOG1 |
| SLN1 | RVS167 | ECM30 | YPR115W | YDR239C | STE11 | HOG1 |
| SLN1 | RVS167 | END3  | PAN1    | BUD6    | STE11 | HOG1 |
| SLN1 | RVS167 | END3  | SLA2    | BUD6    | STE11 | HOG1 |
| SLN1 | RVS167 | GTS1  | PAN1    | BUD6    | STE11 | HOG1 |
| SLN1 | RVS167 | PAN1  | ABP1    | BUD6    | STE11 | HOG1 |
| SLN1 | RVS167 | PAN1  | AIP1    | BUD6    | STE11 | HOG1 |
| SLN1 | RVS167 | PAN1  | BUD6    | HSC82   | STE11 | HOG1 |
| SLN1 | RVS167 | PAN1  | BUD6    | SPA2    | STE11 | HOG1 |
| SLN1 | RVS167 | PAN1  | BUD6    | SPH1    | STE11 | HOG1 |
| SLN1 | RVS167 | PAN1  | BUD6    | STE11   | FUS3  | HOG1 |
| SLN1 | RVS167 | PAN1  | BUD6    | STE11   | HOG1  |      |



|      |        |      |      |         |       |      |
|------|--------|------|------|---------|-------|------|
| SLN1 | RVS167 | PAN1 | BUD6 | STE11   | PBS2  | HOG1 |
| SLN1 | RVS167 | PAN1 | COF1 | BUD6    | STE11 | HOG1 |
| SLN1 | RVS167 | PAN1 | CRN1 | BUD6    | STE11 | HOG1 |
| SLN1 | RVS167 | PAN1 | SAC6 | BUD6    | STE11 | HOG1 |
| SLN1 | RVS167 | PAN1 | SAC6 | VPS21   | STE11 | HOG1 |
| SLN1 | RVS167 | PAN1 | SLA2 | BUD6    | STE11 | HOG1 |
| SLN1 | RVS167 | PAN1 | SRV2 | BUD6    | STE11 | HOG1 |
| SLN1 | RVS167 | PEP1 | DIG1 | BCK2    | STE11 | HOG1 |
| SLN1 | RVS167 | PEP1 | DIG1 | FUS3    | STE11 | HOG1 |
| SLN1 | RVS167 | PEP1 | DIG1 | KSS1    | STE11 | HOG1 |
| SLN1 | RVS167 | PEP1 | DIG1 | STE11   | FUS3  | HOG1 |
| SLN1 | RVS167 | PEP1 | DIG1 | STE11   | HOG1  |      |
| SLN1 | RVS167 | PEP1 | DIG1 | STE11   | PBS2  | HOG1 |
| SLN1 | RVS167 | PEP1 | DIG1 | STE12   | STE11 | HOG1 |
| SLN1 | RVS167 | PEP1 | DIG1 | STE7    | STE11 | HOG1 |
| SLN1 | RVS167 | PEP1 | DIG1 | TEC1    | STE11 | HOG1 |
| SLN1 | RVS167 | PEP1 | DIG1 | YDR239C | STE11 | HOG1 |
| SLN1 | RVS167 | PEP1 | DIG1 | YPR115W | STE11 | HOG1 |
| SLN1 | RVS167 | SAC6 | ABP1 | BUD6    | STE11 | HOG1 |
| SLN1 | RVS167 | SAC6 | AIP1 | BUD6    | STE11 | HOG1 |
| SLN1 | RVS167 | SAC6 | BUD6 | HSC82   | STE11 | HOG1 |
| SLN1 | RVS167 | SAC6 | BUD6 | SPA2    | STE11 | HOG1 |
| SLN1 | RVS167 | SAC6 | BUD6 | SPH1    | STE11 | HOG1 |
| SLN1 | RVS167 | SAC6 | BUD6 | STE11   | FUS3  | HOG1 |
| SLN1 | RVS167 | SAC6 | BUD6 | STE11   | HOG1  |      |

|      |        |      |       |         |       |      |
|------|--------|------|-------|---------|-------|------|
| SLN1 | RVS167 | SAC6 | BUD6  | STE11   | PBS2  | HOG1 |
| SLN1 | RVS167 | SAC6 | CHS5  | VPS21   | STE11 | HOG1 |
| SLN1 | RVS167 | SAC6 | COF1  | BUD6    | STE11 | HOG1 |
| SLN1 | RVS167 | SAC6 | CRN1  | BUD6    | STE11 | HOG1 |
| SLN1 | RVS167 | SAC6 | PAN1  | BUD6    | STE11 | HOG1 |
| SLN1 | RVS167 | SAC6 | SLA2  | BUD6    | STE11 | HOG1 |
| SLN1 | RVS167 | SAC6 | SRV2  | BUD6    | STE11 | HOG1 |
| SLN1 | RVS167 | SAC6 | VPS21 | STE11   | FUS3  | HOG1 |
| SLN1 | RVS167 | SAC6 | VPS21 | STE11   | HOG1  |      |
| SLN1 | RVS167 | SAC6 | VPS21 | STE11   | PBS2  | HOG1 |
| SLN1 | RVS167 | SEC8 | SEC15 | STE50   | STE11 | HOG1 |
| SLN1 | RVS167 | SEC8 | SEC3  | YPR115W | STE11 | HOG1 |
| SLN1 | RVS167 | SKT5 | BCK1  | YPR115W | STE11 | HOG1 |
| SLN1 | RVS167 | SKT5 | BNI1  | BUD6    | STE11 | HOG1 |
| SLN1 | RVS167 | SKT5 | BNI1  | SPA2    | STE11 | HOG1 |
| SLN1 | RVS167 | SKT5 | CLA4  | BUD6    | STE11 | HOG1 |
| SLN1 | RVS167 | SKT5 | CLA4  | SPA2    | STE11 | HOG1 |
| SLN1 | RVS167 | SKT5 | SAC6  | BUD6    | STE11 | HOG1 |
| SLN1 | RVS167 | SKT5 | SAC6  | VPS21   | STE11 | HOG1 |
| SLN1 | RVS167 | SKT5 | SLT2  | FUS3    | STE11 | HOG1 |
| SLN1 | RVS167 | SKT5 | SLT2  | SPA2    | STE11 | HOG1 |
| SLN1 | RVS167 | SKT5 | SMI1  | BCK2    | STE11 | HOG1 |
| SLN1 | RVS167 | SKT5 | SMI1  | SPA2    | STE11 | HOG1 |
| SLN1 | RVS167 | SLA2 | ABP1  | BUD6    | STE11 | HOG1 |

|      |        |      |       |         |       |      |
|------|--------|------|-------|---------|-------|------|
| SLN1 | RVS167 | SLA2 | AIP1  | BUD6    | STE11 | HOG1 |
| SLN1 | RVS167 | SLA2 | BUD6  | HSC82   | STE11 | HOG1 |
| SLN1 | RVS167 | SLA2 | BUD6  | SPA2    | STE11 | HOG1 |
| SLN1 | RVS167 | SLA2 | BUD6  | SPH1    | STE11 | HOG1 |
| SLN1 | RVS167 | SLA2 | BUD6  | STE11   | FUS3  | HOG1 |
| SLN1 | RVS167 | SLA2 | BUD6  | STE11   | HOG1  |      |
| SLN1 | RVS167 | SLA2 | BUD6  | STE11   | PBS2  | HOG1 |
| SLN1 | RVS167 | SLA2 | CLA4  | BUD6    | STE11 | HOG1 |
| SLN1 | RVS167 | SLA2 | CLA4  | SPA2    | STE11 | HOG1 |
| SLN1 | RVS167 | SLA2 | COF1  | BUD6    | STE11 | HOG1 |
| SLN1 | RVS167 | SLA2 | CRN1  | BUD6    | STE11 | HOG1 |
| SLN1 | RVS167 | SLA2 | PAN1  | BUD6    | STE11 | HOG1 |
| SLN1 | RVS167 | SLA2 | SAC6  | BUD6    | STE11 | HOG1 |
| SLN1 | RVS167 | SLA2 | SAC6  | VPS21   | STE11 | HOG1 |
| SLN1 | RVS167 | SLA2 | SRV2  | BUD6    | STE11 | HOG1 |
| SLN1 | RVS167 | SLT2 | BCK1  | YPR115W | STE11 | HOG1 |
| SLN1 | RVS167 | SLT2 | BNI1  | BUD6    | STE11 | HOG1 |
| SLN1 | RVS167 | SLT2 | BNI1  | SPA2    | STE11 | HOG1 |
| SLN1 | RVS167 | SLT2 | CDC28 | BCK2    | STE11 | HOG1 |
| SLN1 | RVS167 | SLT2 | CDC28 | BUD6    | STE11 | HOG1 |
| SLN1 | RVS167 | SLT2 | CDC28 | SPA2    | STE11 | HOG1 |
| SLN1 | RVS167 | SLT2 | CHS5  | VPS21   | STE11 | HOG1 |
| SLN1 | RVS167 | SLT2 | CLA4  | BUD6    | STE11 | HOG1 |
| SLN1 | RVS167 | SLT2 | CLA4  | SPA2    | STE11 | HOG1 |
| SLN1 | RVS167 | SLT2 | CPR6  | HSC82   | STE11 | HOG1 |

|      |        |      |      |         |       |      |
|------|--------|------|------|---------|-------|------|
| SLN1 | RVS167 | SLT2 | FUS3 | DIG1    | STE11 | HOG1 |
| SLN1 | RVS167 | SLT2 | FUS3 | GPA1    | STE11 | HOG1 |
| SLN1 | RVS167 | SLT2 | FUS3 | KSS1    | STE11 | HOG1 |
| SLN1 | RVS167 | SLT2 | FUS3 | SPH1    | STE11 | HOG1 |
| SLN1 | RVS167 | SLT2 | FUS3 | STE11   | HOG1  |      |
| SLN1 | RVS167 | SLT2 | FUS3 | STE11   | PBS2  | HOG1 |
| SLN1 | RVS167 | SLT2 | FUS3 | STE7    | STE11 | HOG1 |
| SLN1 | RVS167 | SLT2 | MKK1 | SPA2    | STE11 | HOG1 |
| SLN1 | RVS167 | SLT2 | MKK1 | SPH1    | STE11 | HOG1 |
| SLN1 | RVS167 | SLT2 | MKK2 | SPA2    | STE11 | HOG1 |
| SLN1 | RVS167 | SLT2 | MKK2 | SPH1    | STE11 | HOG1 |
| SLN1 | RVS167 | SLT2 | MSG5 | FUS3    | STE11 | HOG1 |
| SLN1 | RVS167 | SLT2 | PTC1 | PBS2    | STE11 | HOG1 |
| SLN1 | RVS167 | SLT2 | PTP3 | FUS3    | STE11 | HOG1 |
| SLN1 | RVS167 | SLT2 | SMI1 | BCK2    | STE11 | HOG1 |
| SLN1 | RVS167 | SLT2 | SMI1 | SPA2    | STE11 | HOG1 |
| SLN1 | RVS167 | SLT2 | SPA2 | BUD6    | STE11 | HOG1 |
| SLN1 | RVS167 | SLT2 | SPA2 | STE11   | FUS3  | HOG1 |
| SLN1 | RVS167 | SLT2 | SPA2 | STE11   | HOG1  |      |
| SLN1 | RVS167 | SLT2 | SPA2 | STE11   | PBS2  | HOG1 |
| SLN1 | RVS167 | SLT2 | SPA2 | STE7    | STE11 | HOG1 |
| SLN1 | RVS167 | SMI1 | BCK1 | YPR115W | STE11 | HOG1 |
| SLN1 | RVS167 | SMI1 | BCK2 | DIG1    | STE11 | HOG1 |
| SLN1 | RVS167 | SMI1 | BCK2 | KSS1    | STE11 | HOG1 |

|      |        |      |      |       |       |      |
|------|--------|------|------|-------|-------|------|
| SLN1 | RVS167 | SMI1 | BCK2 | STE11 | FUS3  | HOG1 |
| SLN1 | RVS167 | SMI1 | BCK2 | STE11 | HOG1  |      |
| SLN1 | RVS167 | SMI1 | BCK2 | STE11 | PBS2  | HOG1 |
| SLN1 | RVS167 | SMI1 | BCK2 | STE12 | STE11 | HOG1 |
| SLN1 | RVS167 | SMI1 | BCK2 | STE7  | STE11 | HOG1 |
| SLN1 | RVS167 | SMI1 | BNI1 | BUD6  | STE11 | HOG1 |
| SLN1 | RVS167 | SMI1 | BNI1 | SPA2  | STE11 | HOG1 |
| SLN1 | RVS167 | SMI1 | CHS5 | VPS21 | STE11 | HOG1 |
| SLN1 | RVS167 | SMI1 | CLA4 | BUD6  | STE11 | HOG1 |
| SLN1 | RVS167 | SMI1 | CLA4 | SPA2  | STE11 | HOG1 |
| SLN1 | RVS167 | SMI1 | NBP2 | PBS2  | STE11 | HOG1 |
| SLN1 | RVS167 | SMI1 | PTC1 | PBS2  | STE11 | HOG1 |
| SLN1 | RVS167 | SMI1 | RIC1 | VPS21 | STE11 | HOG1 |
| SLN1 | RVS167 | SMI1 | SLT2 | FUS3  | STE11 | HOG1 |
| SLN1 | RVS167 | SMI1 | SLT2 | SPA2  | STE11 | HOG1 |
| SLN1 | RVS167 | SMI1 | SPA2 | BUD6  | STE11 | HOG1 |
| SLN1 | RVS167 | SMI1 | SPA2 | STE11 | FUS3  | HOG1 |
| SLN1 | RVS167 | SMI1 | SPA2 | STE11 | HOG1  |      |
| SLN1 | RVS167 | SMI1 | SPA2 | STE11 | PBS2  | HOG1 |
| SLN1 | RVS167 | SMI1 | SPA2 | STE7  | STE11 | HOG1 |
| SLN1 | RVS167 | SRV2 | ABP1 | BUD6  | STE11 | HOG1 |
| SLN1 | RVS167 | SRV2 | AIP1 | BUD6  | STE11 | HOG1 |
| SLN1 | RVS167 | SRV2 | BUD6 | HSC82 | STE11 | HOG1 |
| SLN1 | RVS167 | SRV2 | BUD6 | SPA2  | STE11 | HOG1 |
| SLN1 | RVS167 | SRV2 | BUD6 | SPH1  | STE11 | HOG1 |

|      |        |         |       |       |       |      |
|------|--------|---------|-------|-------|-------|------|
| SLN1 | RVS167 | SRV2    | BUD6  | STE11 | FUS3  | HOG1 |
| SLN1 | RVS167 | SRV2    | BUD6  | STE11 | HOG1  |      |
| SLN1 | RVS167 | SRV2    | BUD6  | STE11 | PBS2  | HOG1 |
| SLN1 | RVS167 | SRV2    | COF1  | BUD6  | STE11 | HOG1 |
| SLN1 | RVS167 | SRV2    | CRN1  | BUD6  | STE11 | HOG1 |
| SLN1 | RVS167 | SRV2    | PAN1  | BUD6  | STE11 | HOG1 |
| SLN1 | RVS167 | SRV2    | SAC6  | BUD6  | STE11 | HOG1 |
| SLN1 | RVS167 | SRV2    | SAC6  | VPS21 | STE11 | HOG1 |
| SLN1 | RVS167 | SRV2    | SLA2  | BUD6  | STE11 | HOG1 |
| SLN1 | RVS167 | SUM1    | CDC42 | BUD6  | STE11 | HOG1 |
| SLN1 | RVS167 | SUM1    | CDC42 | SPA2  | STE11 | HOG1 |
| SLN1 | RVS167 | VPS21   | SAC6  | BUD6  | STE11 | HOG1 |
| SLN1 | RVS167 | VPS21   | STE11 | DIG1  | FUS3  | HOG1 |
| SLN1 | RVS167 | VPS21   | STE11 | FUS3  | HOG1  |      |
| SLN1 | RVS167 | VPS21   | STE11 | FUS3  | PTP3  | HOG1 |
| SLN1 | RVS167 | VPS21   | STE11 | FUS3  | RCK1  | HOG1 |
| SLN1 | RVS167 | VPS21   | STE11 | FUS3  | SNF1  | HOG1 |
| SLN1 | RVS167 | VPS21   | STE11 | GPA1  | FUS3  | HOG1 |
| SLN1 | RVS167 | VPS21   | STE11 | KSS1  | FUS3  | HOG1 |
| SLN1 | RVS167 | VPS21   | STE11 | PBS2  | HOG1  |      |
| SLN1 | RVS167 | VPS21   | STE11 | PBS2  | YPD1  | HOG1 |
| SLN1 | RVS167 | VPS21   | STE11 | SPH1  | FUS3  | HOG1 |
| SLN1 | RVS167 | VPS21   | STE11 | STE7  | FUS3  | HOG1 |
| SLN1 | RVS167 | YNL086W | STE50 | STE11 | FUS3  | HOG1 |

|      |        |         |         |       |       |      |
|------|--------|---------|---------|-------|-------|------|
| SLN1 | RVS167 | YNL086W | STE50   | STE11 | HOG1  |      |
| SLN1 | RVS167 | YNL086W | STE50   | STE11 | PBS2  | HOG1 |
| SLN1 | RVS167 | YNL086W | YKL061W | STE50 | STE11 | HOG1 |
| SLN1 | RVS167 | YSC84   | ABP1    | BUD6  | STE11 | HOG1 |
| SLN1 | RVS167 | YSC84   | SLA2    | BUD6  | STE11 | HOG1 |
| SLN1 | YPD1   | PBS2    | SSE2    | HSC82 | STE11 | HOG1 |
| SLN1 | YPD1   | PBS2    | STE11   | DIG1  | FUS3  | HOG1 |
| SLN1 | YPD1   | PBS2    | STE11   | FUS3  | HOG1  |      |
| SLN1 | YPD1   | PBS2    | STE11   | FUS3  | PTP3  | HOG1 |
| SLN1 | YPD1   | PBS2    | STE11   | FUS3  | RCK1  | HOG1 |
| SLN1 | YPD1   | PBS2    | STE11   | FUS3  | SNF1  | HOG1 |
| SLN1 | YPD1   | PBS2    | STE11   | GPA1  | FUS3  | HOG1 |
| SLN1 | YPD1   | PBS2    | STE11   | KSS1  | FUS3  | HOG1 |
| SLN1 | YPD1   | PBS2    | STE11   | SPH1  | FUS3  | HOG1 |
| SLN1 | YPD1   | PBS2    | STE11   | STE7  | FUS3  | HOG1 |
| SLN1 | YPD1   | SSK2    | PBS2    | STE11 | FUS3  | HOG1 |
| SLN1 | YPD1   | SSK2    | PBS2    | STE11 | HOG1  |      |
| SLN1 | YPD1   | SSK2    | PTC1    | PBS2  | STE11 | HOG1 |
| SLN1 | RVS167 | MTH1    | HAP2    | SSK2  | PBS2  | HOG1 |
| SLN1 | RVS167 | MTH1    | HAP2    | SSK2  | YPD1  | HOG1 |
| SLN1 | RVS167 | MTH1    | HAP2    | STD1  | SNF1  | HOG1 |
| SLN1 | YPD1   | SSK2    | HAP2    | STD1  | SNF1  | HOG1 |
| SLN1 | RVS167 | CNA1    | CNB1    | RIC1  | ARP6  | HOG1 |
| SLN1 | RVS167 | BEM1    | CDC28   | KIN2  | HXX1  | HOG1 |
| SLN1 | RVS167 | ABP1    | BEM1    | STE5  | FUS3  | HOG1 |

|      |        |      |      |      |       |      |
|------|--------|------|------|------|-------|------|
| SLN1 | RVS167 | AIP1 | BEM1 | STE5 | FUS3  | HOG1 |
| SLN1 | RVS167 | BEM1 | AKR1 | STE5 | FUS3  | HOG1 |
| SLN1 | RVS167 | BEM1 | STE5 | FUS3 | HOG1  |      |
| SLN1 | RVS167 | BEM1 | STE5 | FUS3 | PTP3  | HOG1 |
| SLN1 | RVS167 | BEM1 | STE5 | FUS3 | RCK1  | HOG1 |
| SLN1 | RVS167 | BEM1 | STE5 | FUS3 | SNF1  | HOG1 |
| SLN1 | RVS167 | BEM1 | STE5 | KSS1 | FUS3  | HOG1 |
| SLN1 | RVS167 | BEM1 | STE5 | STE7 | FUS3  | HOG1 |
| SLN1 | RVS167 | BUD6 | BEM1 | STE5 | FUS3  | HOG1 |
| SLN1 | RVS167 | CLA4 | BEM1 | STE5 | FUS3  | HOG1 |
| SLN1 | RVS167 | COF1 | BEM1 | STE5 | FUS3  | HOG1 |
| SLN1 | RVS167 | CRN1 | BEM1 | STE5 | FUS3  | HOG1 |
| SLN1 | RVS167 | PAN1 | BEM1 | STE5 | FUS3  | HOG1 |
| SLN1 | RVS167 | SAC6 | BEM1 | STE5 | FUS3  | HOG1 |
| SLN1 | RVS167 | SLA2 | BEM1 | STE5 | FUS3  | HOG1 |
| SLN1 | RVS167 | SMI1 | BEM1 | STE5 | FUS3  | HOG1 |
| SLN1 | RVS167 | SRV2 | BEM1 | STE5 | FUS3  | HOG1 |
| SLN1 | RVS167 | CLA4 | BEM3 | DIG1 | FUS3  | HOG1 |
| SLN1 | RVS167 | CLA4 | BEM3 | KSS1 | FUS3  | HOG1 |
| SLN1 | RVS167 | CLA4 | BEM3 | STE7 | FUS3  | HOG1 |
| SLN1 | RVS167 | BEM1 | BEM2 | SIT4 | RCK2  | HOG1 |
| SLN1 | RVS167 | BEM1 | BEM2 | SLT2 | FUS3  | HOG1 |
| SLN1 | RVS167 | BEM1 | BEM2 | SLT2 | PTP3  | HOG1 |
| SLN1 | RVS167 | BEM1 | BNI1 | CHS5 | EMP24 | HOG1 |



|      |        |      |       |       |         |      |
|------|--------|------|-------|-------|---------|------|
| SLN1 | RVS167 | BEM1 | BNI1  | NBP2  | PBS2    | HOG1 |
| SLN1 | RVS167 | BEM1 | BNI1  | SLT2  | FUS3    | HOG1 |
| SLN1 | RVS167 | BEM1 | BNI1  | SLT2  | PTP3    | HOG1 |
| SLN1 | RVS167 | BEM1 | BOI2  | SH01  | PBS2    | HOG1 |
| SLN1 | RVS167 | BEM1 | BUD6  | SPH1  | FUS3    | HOG1 |
| SLN1 | RVS167 | BEM1 | CDC28 | EX084 | VPS9    | HOG1 |
| SLN1 | RVS167 | BEM1 | CDC28 | HCM1  | ARP6    | HOG1 |
| SLN1 | RVS167 | BEM1 | CDC28 | SEC3  | VPS9    | HOG1 |
| SLN1 | RVS167 | BEM1 | CDC28 | SLT2  | FUS3    | HOG1 |
| SLN1 | RVS167 | BEM1 | CDC28 | SLT2  | PTP3    | HOG1 |
| SLN1 | RVS167 | BEM1 | CDC42 | SEC3  | VPS9    | HOG1 |
| SLN1 | RVS167 | BEM1 | CLA4  | CHS5  | EMP24   | HOG1 |
| SLN1 | RVS167 | BEM1 | CLA4  | CTF4  | ARP6    | HOG1 |
| SLN1 | RVS167 | BEM1 | CLA4  | DEP1  | ARP6    | HOG1 |
| SLN1 | RVS167 | BEM1 | CLA4  | SLT2  | FUS3    | HOG1 |
| SLN1 | RVS167 | BEM1 | CLA4  | SLT2  | PTP3    | HOG1 |
| SLN1 | RVS167 | BEM1 | CNB1  | RIC1  | ARP6    | HOG1 |
| SLN1 | RVS167 | BEM1 | COF1  | TEM1  | YGR058W | HOG1 |
| SLN1 | RVS167 | BEM1 | FAR1  | SSK2  | PBS2    | HOG1 |
| SLN1 | RVS167 | BEM1 | FAR1  | SSK2  | YPD1    | HOG1 |
| SLN1 | RVS167 | BEM1 | PH085 | SLT2  | FUS3    | HOG1 |
| SLN1 | RVS167 | BEM1 | PH085 | SLT2  | PTP3    | HOG1 |
| SLN1 | RVS167 | BEM1 | PH085 | SOV1  | PBS2    | HOG1 |
| SLN1 | RVS167 | BEM1 | PH085 | SOV1  | SNF1    | HOG1 |
| SLN1 | RVS167 | BEM1 | PH085 | TEM1  | YGR058W | HOG1 |

|      |        |       |         |       |       |      |
|------|--------|-------|---------|-------|-------|------|
| SLN1 | RVS167 | BEM1  | SAC6    | CHS5  | EMP24 | HOG1 |
| SLN1 | RVS167 | BEM1  | SEC15   | EX084 | VPS9  | HOG1 |
| SLN1 | RVS167 | BEM1  | SEC15   | SEC3  | VPS9  | HOG1 |
| SLN1 | RVS167 | BEM1  | SEC15   | SEC8  | VPS9  | HOG1 |
| SLN1 | RVS167 | BEM1  | SMI1    | CHS5  | EMP24 | HOG1 |
| SLN1 | RVS167 | BEM1  | SMI1    | CTF4  | ARP6  | HOG1 |
| SLN1 | RVS167 | BEM1  | SMI1    | NBP2  | PBS2  | HOG1 |
| SLN1 | RVS167 | BEM1  | SMI1    | PTC1  | PBS2  | HOG1 |
| SLN1 | RVS167 | BEM1  | SMI1    | RIC1  | ARP6  | HOG1 |
| SLN1 | RVS167 | BEM1  | SMI1    | SLT2  | FUS3  | HOG1 |
| SLN1 | RVS167 | BEM1  | SMI1    | SLT2  | PTP3  | HOG1 |
| SLN1 | RVS167 | BEM1  | YEL043W | RIC1  | ARP6  | HOG1 |
| SLN1 | RVS167 | RUD3  | RIC1    | ARP6  | HOG1  |      |
| SLN1 | RVS167 | RUD3  | RIC1    | NBP2  | PBS2  | HOG1 |
| SLN1 | RVS167 | RUD3  | RIC1    | PTC1  | PBS2  | HOG1 |
| SLN1 | RVS167 | RUD3  | RIC1    | SNF4  | RCK1  | HOG1 |
| SLN1 | RVS167 | RUD3  | RIC1    | SNF4  | SNF1  | HOG1 |
| SLN1 | RVS167 | SMI1  | RIC1    | RUD3  | ARP6  | HOG1 |
| SLN1 | RVS167 | VPS21 | RIC1    | RUD3  | ARP6  | HOG1 |
| SLN1 | RVS167 | SKT5  | YPK1    | YPK2  | SNF1  | HOG1 |
| SLN1 | RVS167 | BCK1  | KIC1    | KIN2  | HXK1  | HOG1 |
| SLN1 | RVS167 | BCK1  | KIN2    | HXK1  | HOG1  |      |
| SLN1 | RVS167 | BCK1  | MKK2    | KIN2  | HXK1  | HOG1 |
| SLN1 | RVS167 | BCK1  | SLT2    | KIN2  | HXK1  | HOG1 |

|      |        |       |       |      |      |      |
|------|--------|-------|-------|------|------|------|
| SLN1 | RVS167 | BCK1  | SMK1  | KIN2 | HXK1 | HOG1 |
| SLN1 | RVS167 | BUD6  | CDC28 | KIN2 | HXK1 | HOG1 |
| SLN1 | RVS167 | BUD6  | HSC82 | SSA4 | HXK1 | HOG1 |
| SLN1 | RVS167 | CHS5  | BCK1  | KIN2 | HXK1 | HOG1 |
| SLN1 | RVS167 | CHS5  | SLT2  | KIN2 | HXK1 | HOG1 |
| SLN1 | RVS167 | CHS7  | BCK1  | KIN2 | HXK1 | HOG1 |
| SLN1 | RVS167 | CHS7  | SLT2  | KIN2 | HXK1 | HOG1 |
| SLN1 | RVS167 | CLA4  | BCK1  | KIN2 | HXK1 | HOG1 |
| SLN1 | RVS167 | CLA4  | CDC28 | KIN2 | HXK1 | HOG1 |
| SLN1 | RVS167 | CLA4  | SLT2  | KIN2 | HXK1 | HOG1 |
| SLN1 | RVS167 | ECM30 | BCK1  | KIN2 | HXK1 | HOG1 |
| SLN1 | RVS167 | SKT5  | BCK1  | KIN2 | HXK1 | HOG1 |
| SLN1 | RVS167 | SKT5  | SLT2  | KIN2 | HXK1 | HOG1 |
| SLN1 | RVS167 | SLT2  | BCK1  | KIN2 | HXK1 | HOG1 |
| SLN1 | RVS167 | SLT2  | CDC28 | KIN2 | HXK1 | HOG1 |
| SLN1 | RVS167 | SLT2  | KEL2  | KIN2 | HXK1 | HOG1 |
| SLN1 | RVS167 | SLT2  | KIC1  | KIN2 | HXK1 | HOG1 |
| SLN1 | RVS167 | SLT2  | KIN2  | HXK1 | HOG1 |      |
| SLN1 | RVS167 | SLT2  | MKK2  | KIN2 | HXK1 | HOG1 |
| SLN1 | RVS167 | SLT2  | SMK1  | KIN2 | HXK1 | HOG1 |
| SLN1 | RVS167 | SMI1  | BCK1  | KIN2 | HXK1 | HOG1 |
| SLN1 | RVS167 | SMI1  | SLT2  | KIN2 | HXK1 | HOG1 |
| SLN1 | YPD1   | PBS2  | SH01  | KIN2 | HXK1 | HOG1 |
| SLN1 | YPD1   | PBS2  | SOV1  | KIN2 | HXK1 | HOG1 |
| SLN1 | YPD1   | PBS2  | SSE2  | SSA4 | HXK1 | HOG1 |

|      |        |         |       |       |         |      |
|------|--------|---------|-------|-------|---------|------|
| SLN1 | RVS167 | YNL086W | STE50 | STE5  | FUS3    | HOG1 |
| SLN1 | RVS167 | ABP1    | BUD6  | SPH1  | FUS3    | HOG1 |
| SLN1 | RVS167 | ABP1    | CLA4  | CHS5  | EMP24   | HOG1 |
| SLN1 | RVS167 | ABP1    | CLA4  | CTF4  | ARP6    | HOG1 |
| SLN1 | RVS167 | ABP1    | CLA4  | DEP1  | ARP6    | HOG1 |
| SLN1 | RVS167 | ABP1    | CLA4  | SLT2  | FUS3    | HOG1 |
| SLN1 | RVS167 | ABP1    | CLA4  | SLT2  | PTP3    | HOG1 |
| SLN1 | RVS167 | ABP1    | COF1  | TEM1  | YGR058W | HOG1 |
| SLN1 | RVS167 | ABP1    | PRK1  | AKL1  | ARP6    | HOG1 |
| SLN1 | RVS167 | ABP1    | SAC6  | CHS5  | EMP24   | HOG1 |
| SLN1 | RVS167 | AIP1    | BUD6  | SPH1  | FUS3    | HOG1 |
| SLN1 | RVS167 | AIP1    | COF1  | TEM1  | YGR058W | HOG1 |
| SLN1 | RVS167 | AIP1    | SAC6  | CHS5  | EMP24   | HOG1 |
| SLN1 | RVS167 | AIP1    | TOS3  | SNF4  | RCK1    | HOG1 |
| SLN1 | RVS167 | AIP1    | TOS3  | SNF4  | SNF1    | HOG1 |
| SLN1 | RVS167 | BCK1    | BNI1  | CHS5  | EMP24   | HOG1 |
| SLN1 | RVS167 | BCK1    | BNI1  | NBP2  | PBS2    | HOG1 |
| SLN1 | RVS167 | BCK1    | BNI1  | SLT2  | FUS3    | HOG1 |
| SLN1 | RVS167 | BCK1    | BNI1  | SLT2  | PTP3    | HOG1 |
| SLN1 | RVS167 | BCK1    | BR01  | SLT2  | FUS3    | HOG1 |
| SLN1 | RVS167 | BCK1    | BR01  | SLT2  | PTP3    | HOG1 |
| SLN1 | RVS167 | BCK1    | CHS5  | EMP24 | HOG1    |      |
| SLN1 | RVS167 | BCK1    | CHS5  | SLT2  | FUS3    | HOG1 |
| SLN1 | RVS167 | BCK1    | CHS5  | SLT2  | PTP3    | HOG1 |

|      |        |      |       |         |       |      |
|------|--------|------|-------|---------|-------|------|
| SLN1 | RVS167 | BCK1 | CHS7  | SLT2    | FUS3  | HOG1 |
| SLN1 | RVS167 | BCK1 | CHS7  | SLT2    | PTP3  | HOG1 |
| SLN1 | RVS167 | BCK1 | CLA4  | CHS5    | EMP24 | HOG1 |
| SLN1 | RVS167 | BCK1 | CLA4  | CTF4    | ARP6  | HOG1 |
| SLN1 | RVS167 | BCK1 | CLA4  | DEP1    | ARP6  | HOG1 |
| SLN1 | RVS167 | BCK1 | CLA4  | SLT2    | FUS3  | HOG1 |
| SLN1 | RVS167 | BCK1 | CLA4  | SLT2    | PTP3  | HOG1 |
| SLN1 | RVS167 | BCK1 | ECM30 | SEC3    | VPS9  | HOG1 |
| SLN1 | RVS167 | BCK1 | HKR1  | EMP24   | HOG1  |      |
| SLN1 | RVS167 | BCK1 | KIC1  | SLT2    | FUS3  | HOG1 |
| SLN1 | RVS167 | BCK1 | KIC1  | SLT2    | PTP3  | HOG1 |
| SLN1 | RVS167 | BCK1 | KIN2  | GIS4    | SNF1  | HOG1 |
| SLN1 | RVS167 | BCK1 | KIN2  | SH01    | PBS2  | HOG1 |
| SLN1 | RVS167 | BCK1 | KIN2  | SLT2    | FUS3  | HOG1 |
| SLN1 | RVS167 | BCK1 | KIN2  | SLT2    | PTP3  | HOG1 |
| SLN1 | RVS167 | BCK1 | KIN2  | SOV1    | PBS2  | HOG1 |
| SLN1 | RVS167 | BCK1 | KIN2  | SOV1    | SNF1  | HOG1 |
| SLN1 | RVS167 | BCK1 | KSP1  | SLT2    | FUS3  | HOG1 |
| SLN1 | RVS167 | BCK1 | KSP1  | SLT2    | PTP3  | HOG1 |
| SLN1 | RVS167 | BCK1 | LAS21 | YPR045C | HOG1  |      |
| SLN1 | RVS167 | BCK1 | MKK1  | SLT2    | FUS3  | HOG1 |
| SLN1 | RVS167 | BCK1 | MKK1  | SLT2    | PTP3  | HOG1 |
| SLN1 | RVS167 | BCK1 | MKK1  | SPH1    | FUS3  | HOG1 |
| SLN1 | RVS167 | BCK1 | MKK2  | SLT2    | FUS3  | HOG1 |
| SLN1 | RVS167 | BCK1 | MKK2  | SLT2    | PTP3  | HOG1 |

|      |        |      |       |       |         |      |
|------|--------|------|-------|-------|---------|------|
| SLN1 | RVS167 | BCK1 | MKK2  | SOV1  | PBS2    | HOG1 |
| SLN1 | RVS167 | BCK1 | MKK2  | SOV1  | SNF1    | HOG1 |
| SLN1 | RVS167 | BCK1 | MKK2  | SPH1  | FUS3    | HOG1 |
| SLN1 | RVS167 | BCK1 | MKK2  | TEM1  | YGR058W | HOG1 |
| SLN1 | RVS167 | BCK1 | PH085 | SLT2  | FUS3    | HOG1 |
| SLN1 | RVS167 | BCK1 | PH085 | SLT2  | PTP3    | HOG1 |
| SLN1 | RVS167 | BCK1 | PH085 | SOV1  | PBS2    | HOG1 |
| SLN1 | RVS167 | BCK1 | PH085 | SOV1  | SNF1    | HOG1 |
| SLN1 | RVS167 | BCK1 | PH085 | TEM1  | YGR058W | HOG1 |
| SLN1 | RVS167 | BCK1 | PKC1  | PTC1  | PBS2    | HOG1 |
| SLN1 | RVS167 | BCK1 | PKC1  | SH01  | PBS2    | HOG1 |
| SLN1 | RVS167 | BCK1 | PKC1  | SLT2  | FUS3    | HOG1 |
| SLN1 | RVS167 | BCK1 | PKC1  | SLT2  | PTP3    | HOG1 |
| SLN1 | RVS167 | BCK1 | RAD50 | CTF4  | ARP6    | HOG1 |
| SLN1 | RVS167 | BCK1 | RAD50 | DEP1  | ARP6    | HOG1 |
| SLN1 | RVS167 | BCK1 | RAD50 | SLT2  | FUS3    | HOG1 |
| SLN1 | RVS167 | BCK1 | RAD50 | SLT2  | PTP3    | HOG1 |
| SLN1 | RVS167 | BCK1 | SEC3  | EX084 | VPS9    | HOG1 |
| SLN1 | RVS167 | BCK1 | SEC3  | SEC8  | VPS9    | HOG1 |
| SLN1 | RVS167 | BCK1 | SEC3  | VPS9  | HOG1    |      |
| SLN1 | RVS167 | BCK1 | SKT5  | SLT2  | FUS3    | HOG1 |
| SLN1 | RVS167 | BCK1 | SKT5  | SLT2  | PTP3    | HOG1 |
| SLN1 | RVS167 | BCK1 | SLT2  | CHS5  | EMP24   | HOG1 |
| SLN1 | RVS167 | BCK1 | SLT2  | FUS3  | HOG1    |      |

|      |        |      |         |      |       |      |
|------|--------|------|---------|------|-------|------|
| SLN1 | RVS167 | BCK1 | SLT2    | FUS3 | PTP3  | HOG1 |
| SLN1 | RVS167 | BCK1 | SLT2    | FUS3 | RCK1  | HOG1 |
| SLN1 | RVS167 | BCK1 | SLT2    | FUS3 | SNF1  | HOG1 |
| SLN1 | RVS167 | BCK1 | SLT2    | MSG5 | FUS3  | HOG1 |
| SLN1 | RVS167 | BCK1 | SLT2    | PTC1 | PBS2  | HOG1 |
| SLN1 | RVS167 | BCK1 | SLT2    | PTP3 | FUS3  | HOG1 |
| SLN1 | RVS167 | BCK1 | SLT2    | PTP3 | HOG1  |      |
| SLN1 | RVS167 | BCK1 | SMI1    | CHS5 | EMP24 | HOG1 |
| SLN1 | RVS167 | BCK1 | SMI1    | CTF4 | ARP6  | HOG1 |
| SLN1 | RVS167 | BCK1 | SMI1    | NBP2 | PBS2  | HOG1 |
| SLN1 | RVS167 | BCK1 | SMI1    | PTC1 | PBS2  | HOG1 |
| SLN1 | RVS167 | BCK1 | SMI1    | RIC1 | ARP6  | HOG1 |
| SLN1 | RVS167 | BCK1 | SMI1    | SLT2 | FUS3  | HOG1 |
| SLN1 | RVS167 | BCK1 | SMI1    | SLT2 | PTP3  | HOG1 |
| SLN1 | RVS167 | BCK1 | SMK1    | SLT2 | FUS3  | HOG1 |
| SLN1 | RVS167 | BCK1 | SMK1    | SLT2 | PTP3  | HOG1 |
| SLN1 | RVS167 | BCK1 | YBL044W | SEC3 | VPS9  | HOG1 |
| SLN1 | RVS167 | BCK1 | YJR098C | SEC3 | VPS9  | HOG1 |
| SLN1 | RVS167 | BCK1 | YKL037W | PTC1 | PBS2  | HOG1 |
| SLN1 | RVS167 | BCK1 | YKL037W | SLT2 | FUS3  | HOG1 |
| SLN1 | RVS167 | BCK1 | YKL037W | SLT2 | PTP3  | HOG1 |
| SLN1 | RVS167 | BCK1 | YPR115W | DIG1 | FUS3  | HOG1 |
| SLN1 | RVS167 | BCK1 | YPR115W | KSS1 | FUS3  | HOG1 |
| SLN1 | RVS167 | BCK1 | YPR115W | SEC3 | VPS9  | HOG1 |
| SLN1 | RVS167 | BCK1 | YPR115W | STE7 | FUS3  | HOG1 |

|      |        |      |       |       |         |      |
|------|--------|------|-------|-------|---------|------|
| SLN1 | RVS167 | BUD6 | BNI1  | CHS5  | EMP24   | HOG1 |
| SLN1 | RVS167 | BUD6 | BNI1  | NBP2  | PBS2    | HOG1 |
| SLN1 | RVS167 | BUD6 | BNI1  | SLT2  | FUS3    | HOG1 |
| SLN1 | RVS167 | BUD6 | BNI1  | SLT2  | PTP3    | HOG1 |
| SLN1 | RVS167 | BUD6 | CDC28 | EX084 | VPS9    | HOG1 |
| SLN1 | RVS167 | BUD6 | CDC28 | HCM1  | ARP6    | HOG1 |
| SLN1 | RVS167 | BUD6 | CDC28 | SEC3  | VPS9    | HOG1 |
| SLN1 | RVS167 | BUD6 | CDC28 | SLT2  | FUS3    | HOG1 |
| SLN1 | RVS167 | BUD6 | CDC28 | SLT2  | PTP3    | HOG1 |
| SLN1 | RVS167 | BUD6 | CDC42 | SEC3  | VPS9    | HOG1 |
| SLN1 | RVS167 | BUD6 | CLA4  | CHS5  | EMP24   | HOG1 |
| SLN1 | RVS167 | BUD6 | CLA4  | CTF4  | ARP6    | HOG1 |
| SLN1 | RVS167 | BUD6 | CLA4  | DEP1  | ARP6    | HOG1 |
| SLN1 | RVS167 | BUD6 | CLA4  | SLT2  | FUS3    | HOG1 |
| SLN1 | RVS167 | BUD6 | CLA4  | SLT2  | PTP3    | HOG1 |
| SLN1 | RVS167 | BUD6 | COF1  | TEM1  | YGR058W | HOG1 |
| SLN1 | RVS167 | BUD6 | HSC82 | SSA4  | HOT1    | HOG1 |
| SLN1 | RVS167 | BUD6 | HSC82 | SSE2  | PBS2    | HOG1 |
| SLN1 | RVS167 | BUD6 | SAC6  | CHS5  | EMP24   | HOG1 |
| SLN1 | RVS167 | BUD6 | SPA2  | SLT2  | FUS3    | HOG1 |
| SLN1 | RVS167 | BUD6 | SPA2  | SLT2  | PTP3    | HOG1 |
| SLN1 | RVS167 | BUD6 | SPA2  | STE7  | FUS3    | HOG1 |
| SLN1 | RVS167 | BUD6 | SPH1  | CYC8  | SK01    | HOG1 |
| SLN1 | RVS167 | BUD6 | SPH1  | FUS3  | HOG1    |      |



|      |        |      |        |       |         |      |
|------|--------|------|--------|-------|---------|------|
| SLN1 | RVS167 | BUD6 | SPH1   | FUS3  | PTP3    | HOG1 |
| SLN1 | RVS167 | BUD6 | SPH1   | FUS3  | RCK1    | HOG1 |
| SLN1 | RVS167 | BUD6 | SPH1   | FUS3  | SNF1    | HOG1 |
| SLN1 | RVS167 | BUD6 | SPH1   | STE7  | FUS3    | HOG1 |
| SLN1 | RVS167 | BZZ1 | IMH1   | RIC1  | ARP6    | HOG1 |
| SLN1 | RVS167 | BZZ1 | NIP100 | CIN2  | ARP6    | HOG1 |
| SLN1 | RVS167 | BZZ1 | NIP100 | DEP1  | ARP6    | HOG1 |
| SLN1 | RVS167 | BZZ1 | PEP1   | DIG1  | FUS3    | HOG1 |
| SLN1 | RVS167 | BZZ1 | PER1   | RIC1  | ARP6    | HOG1 |
| SLN1 | RVS167 | BZZ1 | STM1   | CTF4  | ARP6    | HOG1 |
| SLN1 | RVS167 | BZZ1 | STM1   | SEC23 | EMP24   | HOG1 |
| SLN1 | RVS167 | CHS5 | BCK1   | HKR1  | EMP24   | HOG1 |
| SLN1 | RVS167 | CHS5 | BCK1   | LAS21 | YPR045C | HOG1 |
| SLN1 | RVS167 | CHS5 | BCK1   | SEC3  | VPS9    | HOG1 |
| SLN1 | RVS167 | CHS5 | BCK1   | SLT2  | FUS3    | HOG1 |
| SLN1 | RVS167 | CHS5 | BCK1   | SLT2  | PTP3    | HOG1 |
| SLN1 | RVS167 | CHS5 | BEM4   | HKR1  | EMP24   | HOG1 |
| SLN1 | RVS167 | CHS5 | BEM4   | RIC1  | ARP6    | HOG1 |
| SLN1 | RVS167 | CHS5 | BNI1   | NBP2  | PBS2    | HOG1 |
| SLN1 | RVS167 | CHS5 | BNI1   | SLT2  | FUS3    | HOG1 |
| SLN1 | RVS167 | CHS5 | BNI1   | SLT2  | PTP3    | HOG1 |
| SLN1 | RVS167 | CHS5 | CLA4   | CTF4  | ARP6    | HOG1 |
| SLN1 | RVS167 | CHS5 | CLA4   | DEP1  | ARP6    | HOG1 |
| SLN1 | RVS167 | CHS5 | CLA4   | SLT2  | FUS3    | HOG1 |
| SLN1 | RVS167 | CHS5 | CLA4   | SLT2  | PTP3    | HOG1 |

|      |        |      |       |       |         |      |
|------|--------|------|-------|-------|---------|------|
| SLN1 | RVS167 | CHS5 | ECM21 | LAS21 | YPR045C | HOG1 |
| SLN1 | RVS167 | CHS5 | IRA2  | SLT2  | FUS3    | HOG1 |
| SLN1 | RVS167 | CHS5 | IRA2  | SLT2  | PTP3    | HOG1 |
| SLN1 | RVS167 | CHS5 | MRE11 | CTF4  | ARP6    | HOG1 |
| SLN1 | RVS167 | CHS5 | SLT2  | FUS3  | HOG1    |      |
| SLN1 | RVS167 | CHS5 | SLT2  | FUS3  | PTP3    | HOG1 |
| SLN1 | RVS167 | CHS5 | SLT2  | FUS3  | RCK1    | HOG1 |
| SLN1 | RVS167 | CHS5 | SLT2  | FUS3  | SNF1    | HOG1 |
| SLN1 | RVS167 | CHS5 | SLT2  | MSG5  | FUS3    | HOG1 |
| SLN1 | RVS167 | CHS5 | SLT2  | PTC1  | PBS2    | HOG1 |
| SLN1 | RVS167 | CHS5 | SLT2  | PTP3  | FUS3    | HOG1 |
| SLN1 | RVS167 | CHS5 | SLT2  | PTP3  | HOG1    |      |
| SLN1 | RVS167 | CHS5 | SMI1  | CTF4  | ARP6    | HOG1 |
| SLN1 | RVS167 | CHS5 | SMI1  | NBP2  | PBS2    | HOG1 |
| SLN1 | RVS167 | CHS5 | SMI1  | PTC1  | PBS2    | HOG1 |
| SLN1 | RVS167 | CHS5 | SMI1  | RIC1  | ARP6    | HOG1 |
| SLN1 | RVS167 | CHS5 | SMI1  | SLT2  | FUS3    | HOG1 |
| SLN1 | RVS167 | CHS5 | SMI1  | SLT2  | PTP3    | HOG1 |
| SLN1 | RVS167 | CHS5 | VPS21 | DEP1  | ARP6    | HOG1 |
| SLN1 | RVS167 | CHS5 | VPS21 | RIC1  | ARP6    | HOG1 |
| SLN1 | RVS167 | CHS7 | BCK1  | CHS5  | EMP24   | HOG1 |
| SLN1 | RVS167 | CHS7 | BCK1  | HKR1  | EMP24   | HOG1 |
| SLN1 | RVS167 | CHS7 | BCK1  | LAS21 | YPR045C | HOG1 |
| SLN1 | RVS167 | CHS7 | BCK1  | SEC3  | VPS9    | HOG1 |

|      |        |      |      |      |       |      |
|------|--------|------|------|------|-------|------|
| SLN1 | RVS167 | CHS7 | BCK1 | SLT2 | FUS3  | HOG1 |
| SLN1 | RVS167 | CHS7 | BCK1 | SLT2 | PTP3  | HOG1 |
| SLN1 | RVS167 | CHS7 | BNI1 | CHS5 | EMP24 | HOG1 |
| SLN1 | RVS167 | CHS7 | BNI1 | NBP2 | PBS2  | HOG1 |
| SLN1 | RVS167 | CHS7 | BNI1 | SLT2 | FUS3  | HOG1 |
| SLN1 | RVS167 | CHS7 | BNI1 | SLT2 | PTP3  | HOG1 |
| SLN1 | RVS167 | CHS7 | CLA4 | CHS5 | EMP24 | HOG1 |
| SLN1 | RVS167 | CHS7 | CLA4 | CTF4 | ARP6  | HOG1 |
| SLN1 | RVS167 | CHS7 | CLA4 | DEP1 | ARP6  | HOG1 |
| SLN1 | RVS167 | CHS7 | CLA4 | SLT2 | FUS3  | HOG1 |
| SLN1 | RVS167 | CHS7 | CLA4 | SLT2 | PTP3  | HOG1 |
| SLN1 | RVS167 | CHS7 | SAC6 | CHS5 | EMP24 | HOG1 |
| SLN1 | RVS167 | CHS7 | SLT2 | CHS5 | EMP24 | HOG1 |
| SLN1 | RVS167 | CHS7 | SLT2 | FUS3 | HOG1  |      |
| SLN1 | RVS167 | CHS7 | SLT2 | FUS3 | PTP3  | HOG1 |
| SLN1 | RVS167 | CHS7 | SLT2 | FUS3 | RCK1  | HOG1 |
| SLN1 | RVS167 | CHS7 | SLT2 | FUS3 | SNF1  | HOG1 |
| SLN1 | RVS167 | CHS7 | SLT2 | MSG5 | FUS3  | HOG1 |
| SLN1 | RVS167 | CHS7 | SLT2 | PTC1 | PBS2  | HOG1 |
| SLN1 | RVS167 | CHS7 | SLT2 | PTP3 | FUS3  | HOG1 |
| SLN1 | RVS167 | CHS7 | SLT2 | PTP3 | HOG1  |      |
| SLN1 | RVS167 | CHS7 | SMI1 | CHS5 | EMP24 | HOG1 |
| SLN1 | RVS167 | CHS7 | SMI1 | CTF4 | ARP6  | HOG1 |
| SLN1 | RVS167 | CHS7 | SMI1 | NBP2 | PBS2  | HOG1 |
| SLN1 | RVS167 | CHS7 | SMI1 | PTC1 | PBS2  | HOG1 |

|      |        |      |       |       |         |      |
|------|--------|------|-------|-------|---------|------|
| SLN1 | RVS167 | CHS7 | SMI1  | RIC1  | ARP6    | HOG1 |
| SLN1 | RVS167 | CHS7 | SMI1  | SLT2  | FUS3    | HOG1 |
| SLN1 | RVS167 | CHS7 | SMI1  | SLT2  | PTP3    | HOG1 |
| SLN1 | RVS167 | CHS7 | TUS1  | CHS5  | EMP24   | HOG1 |
| SLN1 | RVS167 | CLA4 | BCK1  | CHS5  | EMP24   | HOG1 |
| SLN1 | RVS167 | CLA4 | BCK1  | HKR1  | EMP24   | HOG1 |
| SLN1 | RVS167 | CLA4 | BCK1  | LAS21 | YPR045C | HOG1 |
| SLN1 | RVS167 | CLA4 | BCK1  | SEC3  | VPS9    | HOG1 |
| SLN1 | RVS167 | CLA4 | BCK1  | SLT2  | FUS3    | HOG1 |
| SLN1 | RVS167 | CLA4 | BCK1  | SLT2  | PTP3    | HOG1 |
| SLN1 | RVS167 | CLA4 | BEM2  | SIT4  | RCK2    | HOG1 |
| SLN1 | RVS167 | CLA4 | BEM2  | SLT2  | FUS3    | HOG1 |
| SLN1 | RVS167 | CLA4 | BEM2  | SLT2  | PTP3    | HOG1 |
| SLN1 | RVS167 | CLA4 | BEM4  | CHS5  | EMP24   | HOG1 |
| SLN1 | RVS167 | CLA4 | BEM4  | HKR1  | EMP24   | HOG1 |
| SLN1 | RVS167 | CLA4 | BEM4  | RIC1  | ARP6    | HOG1 |
| SLN1 | RVS167 | CLA4 | BNI1  | CHS5  | EMP24   | HOG1 |
| SLN1 | RVS167 | CLA4 | BNI1  | NBP2  | PBS2    | HOG1 |
| SLN1 | RVS167 | CLA4 | BNI1  | SLT2  | FUS3    | HOG1 |
| SLN1 | RVS167 | CLA4 | BNI1  | SLT2  | PTP3    | HOG1 |
| SLN1 | RVS167 | CLA4 | BOI2  | SH01  | PBS2    | HOG1 |
| SLN1 | RVS167 | CLA4 | BUD6  | SPH1  | FUS3    | HOG1 |
| SLN1 | RVS167 | CLA4 | CDC12 | CIN2  | ARP6    | HOG1 |
| SLN1 | RVS167 | CLA4 | CDC12 | SLT2  | FUS3    | HOG1 |

|      |        |      |        |       |         |      |
|------|--------|------|--------|-------|---------|------|
| SLN1 | RVS167 | CLA4 | CDC12  | SLT2  | PTP3    | HOG1 |
| SLN1 | RVS167 | CLA4 | CDC28  | EX084 | VPS9    | HOG1 |
| SLN1 | RVS167 | CLA4 | CDC28  | HCM1  | ARP6    | HOG1 |
| SLN1 | RVS167 | CLA4 | CDC28  | SEC3  | VPS9    | HOG1 |
| SLN1 | RVS167 | CLA4 | CDC28  | SLT2  | FUS3    | HOG1 |
| SLN1 | RVS167 | CLA4 | CDC28  | SLT2  | PTP3    | HOG1 |
| SLN1 | RVS167 | CLA4 | CDC42  | SEC3  | VPS9    | HOG1 |
| SLN1 | RVS167 | CLA4 | CHS5   | EMP24 | HOG1    |      |
| SLN1 | RVS167 | CLA4 | CHS5   | SLT2  | FUS3    | HOG1 |
| SLN1 | RVS167 | CLA4 | CHS5   | SLT2  | PTP3    | HOG1 |
| SLN1 | RVS167 | CLA4 | CHS7   | SLT2  | FUS3    | HOG1 |
| SLN1 | RVS167 | CLA4 | CHS7   | SLT2  | PTP3    | HOG1 |
| SLN1 | RVS167 | CLA4 | CTF4   | ARP6  | HOG1    |      |
| SLN1 | RVS167 | CLA4 | CTF4   | BUB1  | ARP6    | HOG1 |
| SLN1 | RVS167 | CLA4 | DEP1   | ARP6  | HOG1    |      |
| SLN1 | RVS167 | CLA4 | IXR1   | CHS5  | EMP24   | HOG1 |
| SLN1 | RVS167 | CLA4 | NIP100 | CIN2  | ARP6    | HOG1 |
| SLN1 | RVS167 | CLA4 | NIP100 | DEP1  | ARP6    | HOG1 |
| SLN1 | RVS167 | CLA4 | PEA2   | CHS5  | EMP24   | HOG1 |
| SLN1 | RVS167 | CLA4 | PH085  | SLT2  | FUS3    | HOG1 |
| SLN1 | RVS167 | CLA4 | PH085  | SLT2  | PTP3    | HOG1 |
| SLN1 | RVS167 | CLA4 | PH085  | SOV1  | PBS2    | HOG1 |
| SLN1 | RVS167 | CLA4 | PH085  | SOV1  | SNF1    | HOG1 |
| SLN1 | RVS167 | CLA4 | PH085  | TEM1  | YGR058W | HOG1 |
| SLN1 | RVS167 | CLA4 | RAD50  | CTF4  | ARP6    | HOG1 |

|      |        |      |       |      |       |      |
|------|--------|------|-------|------|-------|------|
| SLN1 | RVS167 | CLA4 | RAD50 | DEP1 | ARP6  | HOG1 |
| SLN1 | RVS167 | CLA4 | RAD50 | SLT2 | FUS3  | HOG1 |
| SLN1 | RVS167 | CLA4 | RAD50 | SLT2 | PTP3  | HOG1 |
| SLN1 | RVS167 | CLA4 | RGA1  | RIC1 | ARP6  | HOG1 |
| SLN1 | RVS167 | CLA4 | SKT5  | SLT2 | FUS3  | HOG1 |
| SLN1 | RVS167 | CLA4 | SKT5  | SLT2 | PTP3  | HOG1 |
| SLN1 | RVS167 | CLA4 | SLK19 | CTF4 | ARP6  | HOG1 |
| SLN1 | RVS167 | CLA4 | SLT2  | CHS5 | EMP24 | HOG1 |
| SLN1 | RVS167 | CLA4 | SLT2  | FUS3 | HOG1  |      |
| SLN1 | RVS167 | CLA4 | SLT2  | FUS3 | PTP3  | HOG1 |
| SLN1 | RVS167 | CLA4 | SLT2  | FUS3 | RCK1  | HOG1 |
| SLN1 | RVS167 | CLA4 | SLT2  | FUS3 | SNF1  | HOG1 |
| SLN1 | RVS167 | CLA4 | SLT2  | MSG5 | FUS3  | HOG1 |
| SLN1 | RVS167 | CLA4 | SLT2  | PTC1 | PBS2  | HOG1 |
| SLN1 | RVS167 | CLA4 | SLT2  | PTP3 | FUS3  | HOG1 |
| SLN1 | RVS167 | CLA4 | SLT2  | PTP3 | HOG1  |      |
| SLN1 | RVS167 | CLA4 | SMI1  | CHS5 | EMP24 | HOG1 |
| SLN1 | RVS167 | CLA4 | SMI1  | CTF4 | ARP6  | HOG1 |
| SLN1 | RVS167 | CLA4 | SMI1  | NBP2 | PBS2  | HOG1 |
| SLN1 | RVS167 | CLA4 | SMI1  | PTC1 | PBS2  | HOG1 |
| SLN1 | RVS167 | CLA4 | SMI1  | RIC1 | ARP6  | HOG1 |
| SLN1 | RVS167 | CLA4 | SMI1  | SLT2 | FUS3  | HOG1 |
| SLN1 | RVS167 | CLA4 | SMI1  | SLT2 | PTP3  | HOG1 |
| SLN1 | RVS167 | CLA4 | SPA2  | SLT2 | FUS3  | HOG1 |

|      |        |      |      |         |         |      |
|------|--------|------|------|---------|---------|------|
| SLN1 | RVS167 | CLA4 | SPA2 | SLT2    | PTP3    | HOG1 |
| SLN1 | RVS167 | CLA4 | SPA2 | STE7    | FUS3    | HOG1 |
| SLN1 | RVS167 | COF1 | BUD6 | SPH1    | FUS3    | HOG1 |
| SLN1 | RVS167 | COF1 | SAC6 | CHS5    | EMP24   | HOG1 |
| SLN1 | RVS167 | COF1 | TEM1 | DIG1    | FUS3    | HOG1 |
| SLN1 | RVS167 | COF1 | TEM1 | WTM2    | HOT1    | HOG1 |
| SLN1 | RVS167 | COF1 | TEM1 | YGR058W | HOG1    |      |
| SLN1 | RVS167 | COF1 | TOS3 | SNF4    | RCK1    | HOG1 |
| SLN1 | RVS167 | COF1 | TOS3 | SNF4    | SNF1    | HOG1 |
| SLN1 | RVS167 | CRN1 | BUD6 | SPH1    | FUS3    | HOG1 |
| SLN1 | RVS167 | CRN1 | COF1 | TEM1    | YGR058W | HOG1 |
| SLN1 | RVS167 | CRN1 | SAC6 | CHS5    | EMP24   | HOG1 |
| SLN1 | RVS167 | CYK3 | BNI1 | CHS5    | EMP24   | HOG1 |
| SLN1 | RVS167 | CYK3 | BNI1 | NBP2    | PBS2    | HOG1 |
| SLN1 | RVS167 | CYK3 | BNI1 | SLT2    | FUS3    | HOG1 |
| SLN1 | RVS167 | CYK3 | BNI1 | SLT2    | PTP3    | HOG1 |
| SLN1 | RVS167 | CYK3 | BOI2 | SH01    | PBS2    | HOG1 |
| SLN1 | RVS167 | CYK3 | CHS7 | SLT2    | FUS3    | HOG1 |
| SLN1 | RVS167 | CYK3 | CHS7 | SLT2    | PTP3    | HOG1 |
| SLN1 | RVS167 | CYK3 | KSP1 | SLT2    | FUS3    | HOG1 |
| SLN1 | RVS167 | CYK3 | KSP1 | SLT2    | PTP3    | HOG1 |
| SLN1 | RVS167 | DEP1 | CLA4 | CHS5    | EMP24   | HOG1 |
| SLN1 | RVS167 | DEP1 | CLA4 | CTF4    | ARP6    | HOG1 |
| SLN1 | RVS167 | DEP1 | CLA4 | SLT2    | FUS3    | HOG1 |
| SLN1 | RVS167 | DEP1 | CLA4 | SLT2    | PTP3    | HOG1 |

|      |        |       |         |       |         |      |
|------|--------|-------|---------|-------|---------|------|
| SLN1 | RVS167 | DEP1  | NIP100  | CIN2  | ARP6    | HOG1 |
| SLN1 | RVS167 | DEP1  | RAD50   | CTF4  | ARP6    | HOG1 |
| SLN1 | RVS167 | DEP1  | RAD50   | SLT2  | FUS3    | HOG1 |
| SLN1 | RVS167 | DEP1  | RAD50   | SLT2  | PTP3    | HOG1 |
| SLN1 | RVS167 | DEP1  | SOH1    | CTF4  | ARP6    | HOG1 |
| SLN1 | RVS167 | DEP1  | SOH1    | STD1  | SNF1    | HOG1 |
| SLN1 | RVS167 | DEP1  | STB5    | MEK1  | SNF1    | HOG1 |
| SLN1 | RVS167 | DEP1  | VMA21   | RIC1  | ARP6    | HOG1 |
| SLN1 | RVS167 | DEP1  | VMA22   | RIC1  | ARP6    | HOG1 |
| SLN1 | RVS167 | DEP1  | VPS21   | CHS5  | EMP24   | HOG1 |
| SLN1 | RVS167 | DEP1  | VPS21   | RIC1  | ARP6    | HOG1 |
| SLN1 | RVS167 | DEP1  | YPL144W | CTF4  | ARP6    | HOG1 |
| SLN1 | RVS167 | ECM30 | BCK1    | CHS5  | EMP24   | HOG1 |
| SLN1 | RVS167 | ECM30 | BCK1    | HKR1  | EMP24   | HOG1 |
| SLN1 | RVS167 | ECM30 | BCK1    | LAS21 | YPR045C | HOG1 |
| SLN1 | RVS167 | ECM30 | BCK1    | SEC3  | VPS9    | HOG1 |
| SLN1 | RVS167 | ECM30 | BCK1    | SLT2  | FUS3    | HOG1 |
| SLN1 | RVS167 | ECM30 | BCK1    | SLT2  | PTP3    | HOG1 |
| SLN1 | RVS167 | ECM30 | SEC3    | EX084 | VPS9    | HOG1 |
| SLN1 | RVS167 | ECM30 | SEC3    | SEC8  | VPS9    | HOG1 |
| SLN1 | RVS167 | ECM30 | SEC3    | VPS9  | HOG1    |      |
| SLN1 | RVS167 | ECM30 | YBL044W | SEC3  | VPS9    | HOG1 |
| SLN1 | RVS167 | ECM30 | YJR098C | SEC3  | VPS9    | HOG1 |
| SLN1 | RVS167 | ECM30 | YPR115W | DIG1  | FUS3    | HOG1 |



|      |        |       |         |      |         |      |
|------|--------|-------|---------|------|---------|------|
| SLN1 | RVS167 | ECM30 | YPR115W | KSS1 | FUS3    | HOG1 |
| SLN1 | RVS167 | ECM30 | YPR115W | SEC3 | VPS9    | HOG1 |
| SLN1 | RVS167 | ECM30 | YPR115W | STE7 | FUS3    | HOG1 |
| SLN1 | RVS167 | END3  | NIP100  | CIN2 | ARP6    | HOG1 |
| SLN1 | RVS167 | END3  | NIP100  | DEP1 | ARP6    | HOG1 |
| SLN1 | RVS167 | END3  | RAD50   | CTF4 | ARP6    | HOG1 |
| SLN1 | RVS167 | END3  | RAD50   | DEP1 | ARP6    | HOG1 |
| SLN1 | RVS167 | END3  | RAD50   | SLT2 | FUS3    | HOG1 |
| SLN1 | RVS167 | END3  | RAD50   | SLT2 | PTP3    | HOG1 |
| SLN1 | RVS167 | GTS1  | SAP190  | SIT4 | RCK2    | HOG1 |
| SLN1 | RVS167 | GTS1  | YAK1    | SLT2 | FUS3    | HOG1 |
| SLN1 | RVS167 | GTS1  | YAK1    | SLT2 | PTP3    | HOG1 |
| SLN1 | RVS167 | MTH1  | HAP5    | STD1 | SNF1    | HOG1 |
| SLN1 | RVS167 | PAN1  | BUD6    | SPH1 | FUS3    | HOG1 |
| SLN1 | RVS167 | PAN1  | COF1    | TEM1 | YGR058W | HOG1 |
| SLN1 | RVS167 | PAN1  | PRK1    | AKL1 | ARP6    | HOG1 |
| SLN1 | RVS167 | PAN1  | SAC6    | CHS5 | EMP24   | HOG1 |
| SLN1 | RVS167 | PEP1  | DIG1    | FUS3 | HOG1    |      |
| SLN1 | RVS167 | PEP1  | DIG1    | FUS3 | PTP3    | HOG1 |
| SLN1 | RVS167 | PEP1  | DIG1    | FUS3 | RCK1    | HOG1 |
| SLN1 | RVS167 | PEP1  | DIG1    | FUS3 | SNF1    | HOG1 |
| SLN1 | RVS167 | PEP1  | DIG1    | KSS1 | FUS3    | HOG1 |
| SLN1 | RVS167 | PEP1  | DIG1    | STE7 | FUS3    | HOG1 |
| SLN1 | RVS167 | PEP1  | DIG1    | TEM1 | YGR058W | HOG1 |
| SLN1 | RVS167 | SAC6  | BEM2    | SIT4 | RCK2    | HOG1 |

|      |        |      |       |       |         |      |
|------|--------|------|-------|-------|---------|------|
| SLN1 | RVS167 | SAC6 | BEM2  | SLT2  | FUS3    | HOG1 |
| SLN1 | RVS167 | SAC6 | BEM2  | SLT2  | PTP3    | HOG1 |
| SLN1 | RVS167 | SAC6 | BUD6  | SPH1  | FUS3    | HOG1 |
| SLN1 | RVS167 | SAC6 | CHS5  | EMP24 | HOG1    |      |
| SLN1 | RVS167 | SAC6 | CHS5  | SLT2  | FUS3    | HOG1 |
| SLN1 | RVS167 | SAC6 | CHS5  | SLT2  | PTP3    | HOG1 |
| SLN1 | RVS167 | SAC6 | CHS7  | SLT2  | FUS3    | HOG1 |
| SLN1 | RVS167 | SAC6 | CHS7  | SLT2  | PTP3    | HOG1 |
| SLN1 | RVS167 | SAC6 | COF1  | TEM1  | YGR058W | HOG1 |
| SLN1 | RVS167 | SAC6 | SKT5  | SLT2  | FUS3    | HOG1 |
| SLN1 | RVS167 | SAC6 | SKT5  | SLT2  | PTP3    | HOG1 |
| SLN1 | RVS167 | SAC6 | VPS21 | CHS5  | EMP24   | HOG1 |
| SLN1 | RVS167 | SAC6 | VPS21 | DEP1  | ARP6    | HOG1 |
| SLN1 | RVS167 | SAC6 | VPS21 | RIC1  | ARP6    | HOG1 |
| SLN1 | RVS167 | SEC8 | EX084 | SEC3  | VPS9    | HOG1 |
| SLN1 | RVS167 | SEC8 | EX084 | VPS9  | HOG1    |      |
| SLN1 | RVS167 | SEC8 | SEC15 | EX084 | VPS9    | HOG1 |
| SLN1 | RVS167 | SEC8 | SEC15 | SEC3  | VPS9    | HOG1 |
| SLN1 | RVS167 | SEC8 | SEC3  | EX084 | VPS9    | HOG1 |
| SLN1 | RVS167 | SEC8 | SEC3  | VPS9  | HOG1    |      |
| SLN1 | RVS167 | SKT5 | BCK1  | CHS5  | EMP24   | HOG1 |
| SLN1 | RVS167 | SKT5 | BCK1  | HKR1  | EMP24   | HOG1 |
| SLN1 | RVS167 | SKT5 | BCK1  | LAS21 | YPR045C | HOG1 |
| SLN1 | RVS167 | SKT5 | BCK1  | SEC3  | VPS9    | HOG1 |

|      |        |      |       |      |       |      |
|------|--------|------|-------|------|-------|------|
| SLN1 | RVS167 | SKT5 | BCK1  | SLT2 | FUS3  | HOG1 |
| SLN1 | RVS167 | SKT5 | BCK1  | SLT2 | PTP3  | HOG1 |
| SLN1 | RVS167 | SKT5 | BNI1  | CHS5 | EMP24 | HOG1 |
| SLN1 | RVS167 | SKT5 | BNI1  | NBP2 | PBS2  | HOG1 |
| SLN1 | RVS167 | SKT5 | BNI1  | SLT2 | FUS3  | HOG1 |
| SLN1 | RVS167 | SKT5 | BNI1  | SLT2 | PTP3  | HOG1 |
| SLN1 | RVS167 | SKT5 | CDC12 | CIN2 | ARP6  | HOG1 |
| SLN1 | RVS167 | SKT5 | CDC12 | SLT2 | FUS3  | HOG1 |
| SLN1 | RVS167 | SKT5 | CDC12 | SLT2 | PTP3  | HOG1 |
| SLN1 | RVS167 | SKT5 | CLA4  | CHS5 | EMP24 | HOG1 |
| SLN1 | RVS167 | SKT5 | CLA4  | CTF4 | ARP6  | HOG1 |
| SLN1 | RVS167 | SKT5 | CLA4  | DEP1 | ARP6  | HOG1 |
| SLN1 | RVS167 | SKT5 | CLA4  | SLT2 | FUS3  | HOG1 |
| SLN1 | RVS167 | SKT5 | CLA4  | SLT2 | PTP3  | HOG1 |
| SLN1 | RVS167 | SKT5 | PTC4  | SIT4 | RCK2  | HOG1 |
| SLN1 | RVS167 | SKT5 | SAC6  | CHS5 | EMP24 | HOG1 |
| SLN1 | RVS167 | SKT5 | SLT2  | CHS5 | EMP24 | HOG1 |
| SLN1 | RVS167 | SKT5 | SLT2  | FUS3 | HOG1  |      |
| SLN1 | RVS167 | SKT5 | SLT2  | FUS3 | PTP3  | HOG1 |
| SLN1 | RVS167 | SKT5 | SLT2  | FUS3 | RCK1  | HOG1 |
| SLN1 | RVS167 | SKT5 | SLT2  | FUS3 | SNF1  | HOG1 |
| SLN1 | RVS167 | SKT5 | SLT2  | MSG5 | FUS3  | HOG1 |
| SLN1 | RVS167 | SKT5 | SLT2  | PTC1 | PBS2  | HOG1 |
| SLN1 | RVS167 | SKT5 | SLT2  | PTP3 | FUS3  | HOG1 |
| SLN1 | RVS167 | SKT5 | SLT2  | PTP3 | HOG1  |      |

|      |        |      |       |       |         |      |
|------|--------|------|-------|-------|---------|------|
| SLN1 | RVS167 | SKT5 | SMI1  | CHS5  | EMP24   | HOG1 |
| SLN1 | RVS167 | SKT5 | SMI1  | CTF4  | ARP6    | HOG1 |
| SLN1 | RVS167 | SKT5 | SMI1  | NBP2  | PBS2    | HOG1 |
| SLN1 | RVS167 | SKT5 | SMI1  | PTC1  | PBS2    | HOG1 |
| SLN1 | RVS167 | SKT5 | SMI1  | RIC1  | ARP6    | HOG1 |
| SLN1 | RVS167 | SKT5 | SMI1  | SLT2  | FUS3    | HOG1 |
| SLN1 | RVS167 | SKT5 | SMI1  | SLT2  | PTP3    | HOG1 |
| SLN1 | RVS167 | SKT5 | TUS1  | CHS5  | EMP24   | HOG1 |
| SLN1 | RVS167 | SLA2 | BUD6  | SPH1  | FUS3    | HOG1 |
| SLN1 | RVS167 | SLA2 | CLA4  | CHS5  | EMP24   | HOG1 |
| SLN1 | RVS167 | SLA2 | CLA4  | CTF4  | ARP6    | HOG1 |
| SLN1 | RVS167 | SLA2 | CLA4  | DEP1  | ARP6    | HOG1 |
| SLN1 | RVS167 | SLA2 | CLA4  | SLT2  | FUS3    | HOG1 |
| SLN1 | RVS167 | SLA2 | CLA4  | SLT2  | PTP3    | HOG1 |
| SLN1 | RVS167 | SLA2 | COF1  | TEM1  | YGR058W | HOG1 |
| SLN1 | RVS167 | SLA2 | SAC6  | CHS5  | EMP24   | HOG1 |
| SLN1 | RVS167 | SLT2 | BCK1  | CHS5  | EMP24   | HOG1 |
| SLN1 | RVS167 | SLT2 | BCK1  | HKR1  | EMP24   | HOG1 |
| SLN1 | RVS167 | SLT2 | BCK1  | LAS21 | YPR045C | HOG1 |
| SLN1 | RVS167 | SLT2 | BCK1  | SEC3  | VPS9    | HOG1 |
| SLN1 | RVS167 | SLT2 | BEM2  | SIT4  | RCK2    | HOG1 |
| SLN1 | RVS167 | SLT2 | BNI1  | CHS5  | EMP24   | HOG1 |
| SLN1 | RVS167 | SLT2 | BNI1  | NBP2  | PBS2    | HOG1 |
| SLN1 | RVS167 | SLT2 | CDC12 | CIN2  | ARP6    | HOG1 |

|      |        |      |       |         |         |      |
|------|--------|------|-------|---------|---------|------|
| SLN1 | RVS167 | SLT2 | CDC28 | EX084   | VPS9    | HOG1 |
| SLN1 | RVS167 | SLT2 | CDC28 | HCM1    | ARP6    | HOG1 |
| SLN1 | RVS167 | SLT2 | CDC28 | SEC3    | VPS9    | HOG1 |
| SLN1 | RVS167 | SLT2 | CHS5  | EMP24   | HOG1    |      |
| SLN1 | RVS167 | SLT2 | CLA4  | CHS5    | EMP24   | HOG1 |
| SLN1 | RVS167 | SLT2 | CLA4  | CTF4    | ARP6    | HOG1 |
| SLN1 | RVS167 | SLT2 | CLA4  | DEP1    | ARP6    | HOG1 |
| SLN1 | RVS167 | SLT2 | CPR6  | NBP2    | PBS2    | HOG1 |
| SLN1 | RVS167 | SLT2 | CPR6  | YDR128W | SNF1    | HOG1 |
| SLN1 | RVS167 | SLT2 | FUS3  | PTP3    | HOG1    |      |
| SLN1 | RVS167 | SLT2 | FUS3  | RCK1    | HOG1    |      |
| SLN1 | RVS167 | SLT2 | FUS3  | RCK1    | SNF1    | HOG1 |
| SLN1 | RVS167 | SLT2 | FUS3  | SNF1    | HOG1    |      |
| SLN1 | RVS167 | SLT2 | FUS3  | SNF1    | RCK1    | HOG1 |
| SLN1 | RVS167 | SLT2 | IRA2  | CHS5    | EMP24   | HOG1 |
| SLN1 | RVS167 | SLT2 | KEL2  | GIS4    | SNF1    | HOG1 |
| SLN1 | RVS167 | SLT2 | KIN2  | GIS4    | SNF1    | HOG1 |
| SLN1 | RVS167 | SLT2 | KIN2  | SH01    | PBS2    | HOG1 |
| SLN1 | RVS167 | SLT2 | KIN2  | SOV1    | PBS2    | HOG1 |
| SLN1 | RVS167 | SLT2 | KIN2  | SOV1    | SNF1    | HOG1 |
| SLN1 | RVS167 | SLT2 | MKK1  | SPH1    | FUS3    | HOG1 |
| SLN1 | RVS167 | SLT2 | MKK2  | SOV1    | PBS2    | HOG1 |
| SLN1 | RVS167 | SLT2 | MKK2  | SOV1    | SNF1    | HOG1 |
| SLN1 | RVS167 | SLT2 | MKK2  | SPH1    | FUS3    | HOG1 |
| SLN1 | RVS167 | SLT2 | MKK2  | TEM1    | YGR058W | HOG1 |

|      |        |      |       |      |         |      |
|------|--------|------|-------|------|---------|------|
| SLN1 | RVS167 | SLT2 | MSG5  | FUS3 | HOG1    |      |
| SLN1 | RVS167 | SLT2 | MSG5  | FUS3 | PTP3    | HOG1 |
| SLN1 | RVS167 | SLT2 | MSG5  | FUS3 | RCK1    | HOG1 |
| SLN1 | RVS167 | SLT2 | MSG5  | FUS3 | SNF1    | HOG1 |
| SLN1 | RVS167 | SLT2 | PH085 | SOV1 | PBS2    | HOG1 |
| SLN1 | RVS167 | SLT2 | PH085 | SOV1 | SNF1    | HOG1 |
| SLN1 | RVS167 | SLT2 | PH085 | TEM1 | YGR058W | HOG1 |
| SLN1 | RVS167 | SLT2 | PKC1  | PTC1 | PBS2    | HOG1 |
| SLN1 | RVS167 | SLT2 | PKC1  | SH01 | PBS2    | HOG1 |
| SLN1 | RVS167 | SLT2 | PTC1  | NBP2 | PBS2    | HOG1 |
| SLN1 | RVS167 | SLT2 | PTC1  | PBS2 | HOG1    |      |
| SLN1 | RVS167 | SLT2 | PTC1  | PBS2 | YPD1    | HOG1 |
| SLN1 | RVS167 | SLT2 | PTC1  | RIC1 | ARP6    | HOG1 |
| SLN1 | RVS167 | SLT2 | PTC1  | SSK2 | PBS2    | HOG1 |
| SLN1 | RVS167 | SLT2 | PTC1  | SSK2 | YPD1    | HOG1 |
| SLN1 | RVS167 | SLT2 | PTP3  | FUS3 | HOG1    |      |
| SLN1 | RVS167 | SLT2 | PTP3  | FUS3 | RCK1    | HOG1 |
| SLN1 | RVS167 | SLT2 | PTP3  | FUS3 | SNF1    | HOG1 |
| SLN1 | RVS167 | SLT2 | RAD50 | CTF4 | ARP6    | HOG1 |
| SLN1 | RVS167 | SLT2 | RAD50 | DEP1 | ARP6    | HOG1 |
| SLN1 | RVS167 | SLT2 | SMI1  | CHS5 | EMP24   | HOG1 |
| SLN1 | RVS167 | SLT2 | SMI1  | CTF4 | ARP6    | HOG1 |
| SLN1 | RVS167 | SLT2 | SMI1  | NBP2 | PBS2    | HOG1 |
| SLN1 | RVS167 | SLT2 | SMI1  | PTC1 | PBS2    | HOG1 |

|      |        |      |         |       |         |      |
|------|--------|------|---------|-------|---------|------|
| SLN1 | RVS167 | SLT2 | SMI1    | RIC1  | ARP6    | HOG1 |
| SLN1 | RVS167 | SLT2 | SPA2    | STE7  | FUS3    | HOG1 |
| SLN1 | RVS167 | SLT2 | YKL037W | PTC1  | PBS2    | HOG1 |
| SLN1 | RVS167 | SLT2 | YLR446W | STD1  | SNF1    | HOG1 |
| SLN1 | RVS167 | SMI1 | ASC1    | CHS5  | EMP24   | HOG1 |
| SLN1 | RVS167 | SMI1 | BCK1    | CHS5  | EMP24   | HOG1 |
| SLN1 | RVS167 | SMI1 | BCK1    | HKR1  | EMP24   | HOG1 |
| SLN1 | RVS167 | SMI1 | BCK1    | LAS21 | YPR045C | HOG1 |
| SLN1 | RVS167 | SMI1 | BCK1    | SEC3  | VPS9    | HOG1 |
| SLN1 | RVS167 | SMI1 | BCK1    | SLT2  | FUS3    | HOG1 |
| SLN1 | RVS167 | SMI1 | BCK1    | SLT2  | PTP3    | HOG1 |
| SLN1 | RVS167 | SMI1 | BCK2    | DIG1  | FUS3    | HOG1 |
| SLN1 | RVS167 | SMI1 | BCK2    | KSS1  | FUS3    | HOG1 |
| SLN1 | RVS167 | SMI1 | BCK2    | STE7  | FUS3    | HOG1 |
| SLN1 | RVS167 | SMI1 | BEM2    | SIT4  | RCK2    | HOG1 |
| SLN1 | RVS167 | SMI1 | BEM2    | SLT2  | FUS3    | HOG1 |
| SLN1 | RVS167 | SMI1 | BEM2    | SLT2  | PTP3    | HOG1 |
| SLN1 | RVS167 | SMI1 | BNI1    | CHS5  | EMP24   | HOG1 |
| SLN1 | RVS167 | SMI1 | BNI1    | NBP2  | PBS2    | HOG1 |
| SLN1 | RVS167 | SMI1 | BNI1    | SLT2  | FUS3    | HOG1 |
| SLN1 | RVS167 | SMI1 | BNI1    | SLT2  | PTP3    | HOG1 |
| SLN1 | RVS167 | SMI1 | CHS5    | EMP24 | HOG1    |      |
| SLN1 | RVS167 | SMI1 | CHS5    | SLT2  | FUS3    | HOG1 |
| SLN1 | RVS167 | SMI1 | CHS5    | SLT2  | PTP3    | HOG1 |
| SLN1 | RVS167 | SMI1 | CHS7    | SLT2  | FUS3    | HOG1 |

|      |        |      |       |       |         |      |
|------|--------|------|-------|-------|---------|------|
| SLN1 | RVS167 | SMI1 | CHS7  | SLT2  | PTP3    | HOG1 |
| SLN1 | RVS167 | SMI1 | CLA4  | CHS5  | EMP24   | HOG1 |
| SLN1 | RVS167 | SMI1 | CLA4  | CTF4  | ARP6    | HOG1 |
| SLN1 | RVS167 | SMI1 | CLA4  | DEP1  | ARP6    | HOG1 |
| SLN1 | RVS167 | SMI1 | CLA4  | SLT2  | FUS3    | HOG1 |
| SLN1 | RVS167 | SMI1 | CLA4  | SLT2  | PTP3    | HOG1 |
| SLN1 | RVS167 | SMI1 | CNB1  | RIC1  | ARP6    | HOG1 |
| SLN1 | RVS167 | SMI1 | CTF4  | ARP6  | HOG1    |      |
| SLN1 | RVS167 | SMI1 | CTF4  | BUB1  | ARP6    | HOG1 |
| SLN1 | RVS167 | SMI1 | ECM21 | CHS5  | EMP24   | HOG1 |
| SLN1 | RVS167 | SMI1 | ECM21 | LAS21 | YPR045C | HOG1 |
| SLN1 | RVS167 | SMI1 | NBP2  | CIN2  | ARP6    | HOG1 |
| SLN1 | RVS167 | SMI1 | NBP2  | PBS2  | HOG1    |      |
| SLN1 | RVS167 | SMI1 | NBP2  | PBS2  | YPD1    | HOG1 |
| SLN1 | RVS167 | SMI1 | NBP2  | PTC1  | PBS2    | HOG1 |
| SLN1 | RVS167 | SMI1 | NBP2  | RIC1  | ARP6    | HOG1 |
| SLN1 | RVS167 | SMI1 | PH085 | SLT2  | FUS3    | HOG1 |
| SLN1 | RVS167 | SMI1 | PH085 | SLT2  | PTP3    | HOG1 |
| SLN1 | RVS167 | SMI1 | PH085 | SOV1  | PBS2    | HOG1 |
| SLN1 | RVS167 | SMI1 | PH085 | SOV1  | SNF1    | HOG1 |
| SLN1 | RVS167 | SMI1 | PH085 | TEM1  | YGR058W | HOG1 |
| SLN1 | RVS167 | SMI1 | PTC1  | NBP2  | PBS2    | HOG1 |
| SLN1 | RVS167 | SMI1 | PTC1  | PBS2  | HOG1    |      |
| SLN1 | RVS167 | SMI1 | PTC1  | PBS2  | YPD1    | HOG1 |



|      |        |      |      |      |       |      |
|------|--------|------|------|------|-------|------|
| SLN1 | RVS167 | SMI1 | PTC1 | RIC1 | ARP6  | HOG1 |
| SLN1 | RVS167 | SMI1 | PTC1 | SLT2 | FUS3  | HOG1 |
| SLN1 | RVS167 | SMI1 | PTC1 | SLT2 | PTP3  | HOG1 |
| SLN1 | RVS167 | SMI1 | PTC1 | SSK2 | PBS2  | HOG1 |
| SLN1 | RVS167 | SMI1 | PTC1 | SSK2 | YPD1  | HOG1 |
| SLN1 | RVS167 | SMI1 | RIC1 | ARP6 | HOG1  |      |
| SLN1 | RVS167 | SMI1 | RIC1 | NBP2 | PBS2  | HOG1 |
| SLN1 | RVS167 | SMI1 | RIC1 | PTC1 | PBS2  | HOG1 |
| SLN1 | RVS167 | SMI1 | RIC1 | SNF4 | RCK1  | HOG1 |
| SLN1 | RVS167 | SMI1 | RIC1 | SNF4 | SNF1  | HOG1 |
| SLN1 | RVS167 | SMI1 | RLM1 | SLT2 | FUS3  | HOG1 |
| SLN1 | RVS167 | SMI1 | RLM1 | SLT2 | PTP3  | HOG1 |
| SLN1 | RVS167 | SMI1 | SKT5 | SLT2 | FUS3  | HOG1 |
| SLN1 | RVS167 | SMI1 | SKT5 | SLT2 | PTP3  | HOG1 |
| SLN1 | RVS167 | SMI1 | SLT2 | CHS5 | EMP24 | HOG1 |
| SLN1 | RVS167 | SMI1 | SLT2 | FUS3 | HOG1  |      |
| SLN1 | RVS167 | SMI1 | SLT2 | FUS3 | PTP3  | HOG1 |
| SLN1 | RVS167 | SMI1 | SLT2 | FUS3 | RCK1  | HOG1 |
| SLN1 | RVS167 | SMI1 | SLT2 | FUS3 | SNF1  | HOG1 |
| SLN1 | RVS167 | SMI1 | SLT2 | MSG5 | FUS3  | HOG1 |
| SLN1 | RVS167 | SMI1 | SLT2 | PTC1 | PBS2  | HOG1 |
| SLN1 | RVS167 | SMI1 | SLT2 | PTP3 | FUS3  | HOG1 |
| SLN1 | RVS167 | SMI1 | SLT2 | PTP3 | HOG1  |      |
| SLN1 | RVS167 | SMI1 | SPA2 | SLT2 | FUS3  | HOG1 |
| SLN1 | RVS167 | SMI1 | SPA2 | SLT2 | PTP3  | HOG1 |

|      |        |         |       |       |         |      |
|------|--------|---------|-------|-------|---------|------|
| SLN1 | RVS167 | SMI1    | SPA2  | STE7  | FUS3    | HOG1 |
| SLN1 | RVS167 | SRV2    | BUD6  | SPH1  | FUS3    | HOG1 |
| SLN1 | RVS167 | SRV2    | COF1  | TEM1  | YGR058W | HOG1 |
| SLN1 | RVS167 | SRV2    | SAC6  | CHS5  | EMP24   | HOG1 |
| SLN1 | RVS167 | SUM1    | ARL3  | ARF1  | SNF1    | HOG1 |
| SLN1 | RVS167 | SUM1    | ARL3  | RIC1  | ARP6    | HOG1 |
| SLN1 | RVS167 | SUM1    | CDC42 | SEC3  | VPS9    | HOG1 |
| SLN1 | RVS167 | VPS21   | CHS5  | EMP24 | HOG1    |      |
| SLN1 | RVS167 | VPS21   | CHS5  | SLT2  | FUS3    | HOG1 |
| SLN1 | RVS167 | VPS21   | CHS5  | SLT2  | PTP3    | HOG1 |
| SLN1 | RVS167 | VPS21   | DEP1  | ARP6  | HOG1    |      |
| SLN1 | RVS167 | VPS21   | RHO2  | RRP5  | PTP3    | HOG1 |
| SLN1 | RVS167 | VPS21   | RIC1  | ARP6  | HOG1    |      |
| SLN1 | RVS167 | VPS21   | RIC1  | NBP2  | PBS2    | HOG1 |
| SLN1 | RVS167 | VPS21   | RIC1  | PTC1  | PBS2    | HOG1 |
| SLN1 | RVS167 | VPS21   | RIC1  | SNF4  | RCK1    | HOG1 |
| SLN1 | RVS167 | VPS21   | RIC1  | SNF4  | SNF1    | HOG1 |
| SLN1 | RVS167 | VPS21   | SAC6  | CHS5  | EMP24   | HOG1 |
| SLN1 | RVS167 | VPS21   | YPT7  | RIC1  | ARP6    | HOG1 |
| SLN1 | RVS167 | YNL086W | STE50 | AKL1  | ARP6    | HOG1 |
| SLN1 | RVS167 | YSC84   | STM1  | CTF4  | ARP6    | HOG1 |
| SLN1 | RVS167 | YSC84   | STM1  | SEC23 | EMP24   | HOG1 |
| SLN1 | RVS167 | YSC84   | SYS1  | RIC1  | ARP6    | HOG1 |
| SLN1 | YPD1   | PBS2    | NBP2  | CIN2  | ARP6    | HOG1 |

|      |      |      |      |         |      |      |
|------|------|------|------|---------|------|------|
| SLN1 | YPD1 | PBS2 | NBP2 | RIC1    | ARP6 | HOG1 |
| SLN1 | YPD1 | PBS2 | PTC1 | RIC1    | ARP6 | HOG1 |
| SLN1 | YPD1 | PBS2 | PTC1 | SLT2    | FUS3 | HOG1 |
| SLN1 | YPD1 | PBS2 | PTC1 | SLT2    | PTP3 | HOG1 |
| SLN1 | YPD1 | PBS2 | SOV1 | MEK1    | SNF1 | HOG1 |
| SLN1 | YPD1 | PBS2 | SOV1 | SNF1    | FUS3 | HOG1 |
| SLN1 | YPD1 | PBS2 | SOV1 | SNF1    | HOG1 |      |
| SLN1 | YPD1 | PBS2 | SOV1 | SNF1    | RCK1 | HOG1 |
| SLN1 | YPD1 | PBS2 | SOV1 | YDR128W | SNF1 | HOG1 |
| SLN1 | YPD1 | PBS2 | SSE2 | SSA4    | HOT1 | HOG1 |
| SLN1 | YPD1 | SSK2 | HEX3 | CTF4    | ARP6 | HOG1 |
| SLN1 | YPD1 | SSK2 | PBS2 | SOV1    | SNF1 | HOG1 |
| SLN1 | YPD1 | SSK2 | PTC1 | NBP2    | PBS2 | HOG1 |
| SLN1 | YPD1 | SSK2 | PTC1 | PBS2    | HOG1 |      |
| SLN1 | YPD1 | SSK2 | PTC1 | RIC1    | ARP6 | HOG1 |
| SLN1 | YPD1 | SSK2 | PTC1 | SLT2    | FUS3 | HOG1 |
| SLN1 | YPD1 | SSK2 | PTC1 | SLT2    | PTP3 | HOG1 |
